# Supplementary material for: Synthesis and coordination of hybrid phosphinoferrocenes with extended donor pendants
Source: Royal Society of Chemistry journal article supplement (doi:10.1039/d2dt02514k), 2022-01-01
Supplement: d2dt02514k1.pdf [file d2dt02514k1.pdf]

# Supporting Information

for

## Synthesis and coordination of hybrid phosphinoferrocene ligands with extended donor pendants

Michal Navrátil, Ivana Císařová and Petr Štěpnička\*

### Contents

|                                                               |      |
|---------------------------------------------------------------|------|
| Additional structure diagrams and crystallographic parameters | S-2  |
| Copies of the NMR spectra                                     | S-10 |

## Additional structure diagrams and crystallographic parameters

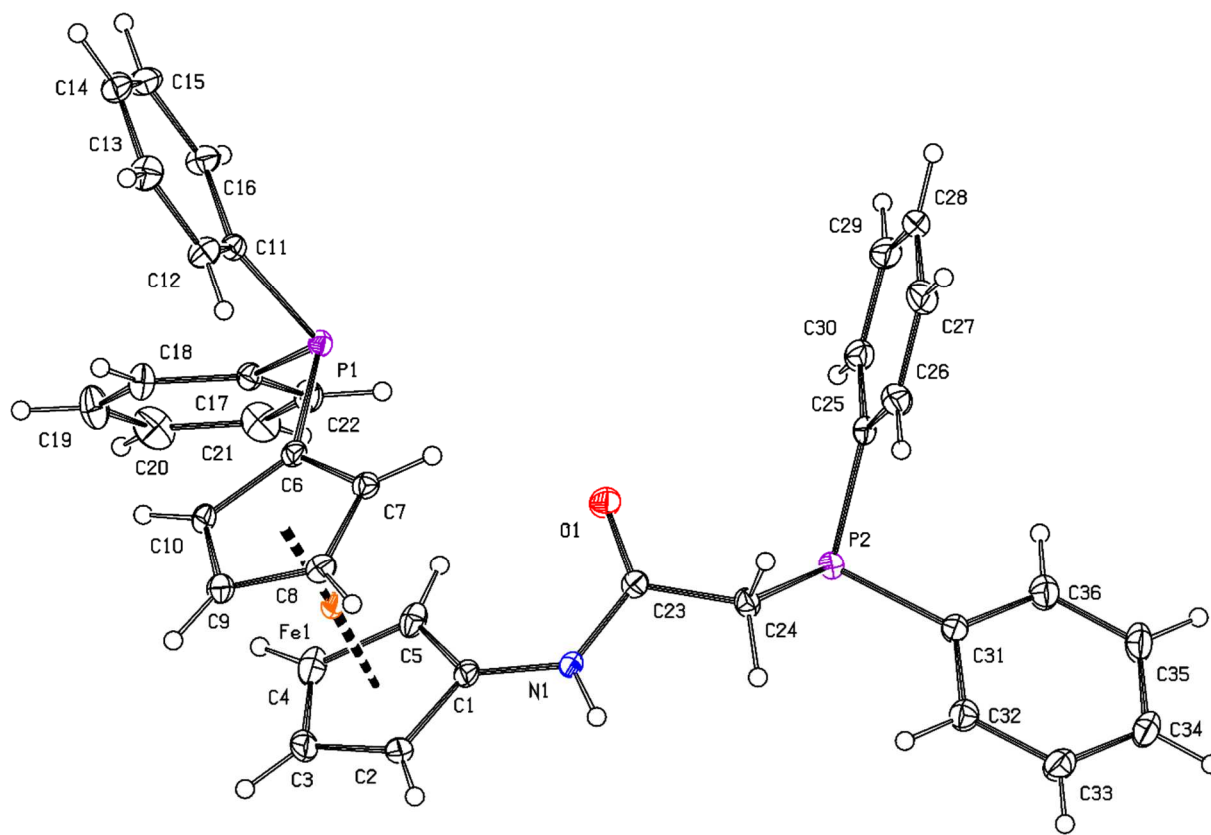

**Figure S1** PLATON plot of the structure of **1** showing displacement ellipsoids at the 30% probability level

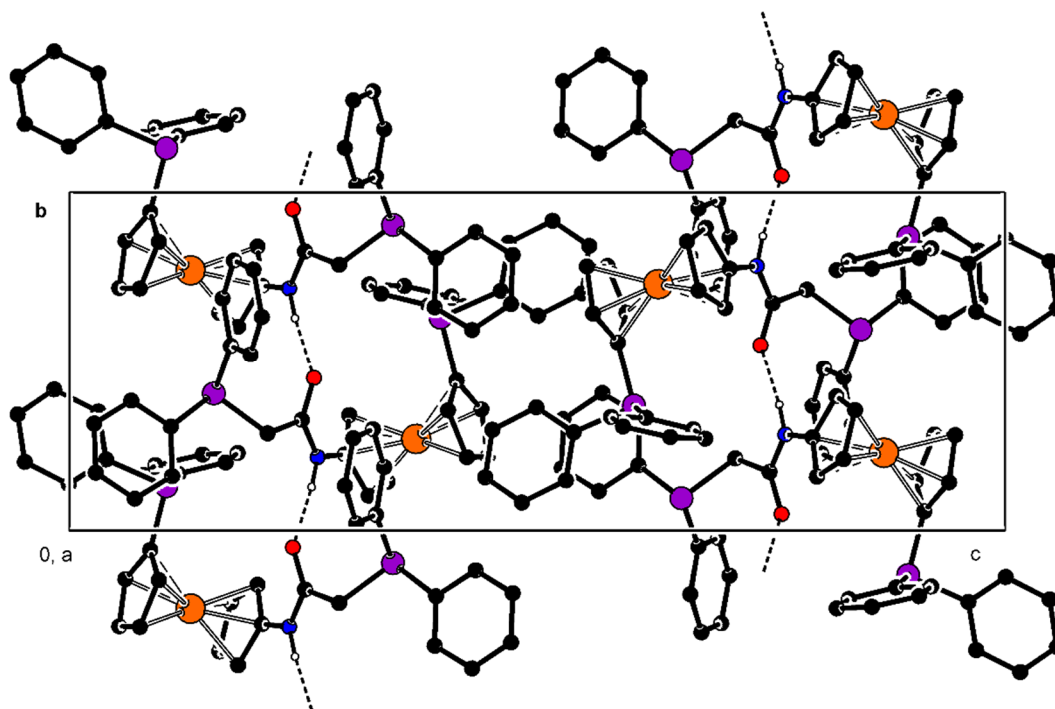

**Figure S2** Packing diagram for **1** showing the NH...O=C hydrogen bonds (only NH hydrogens are shown for clarity)

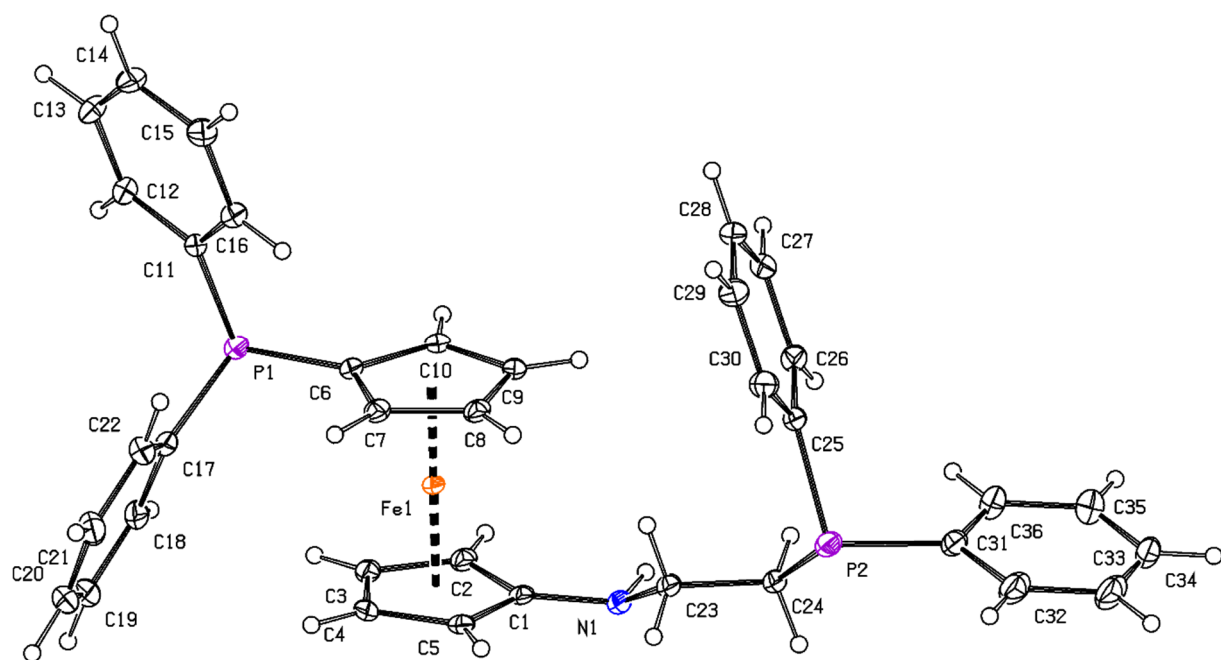

**Figure S3** PLATON plot of the structure of **2** showing displacement ellipsoids at the 30% probability level

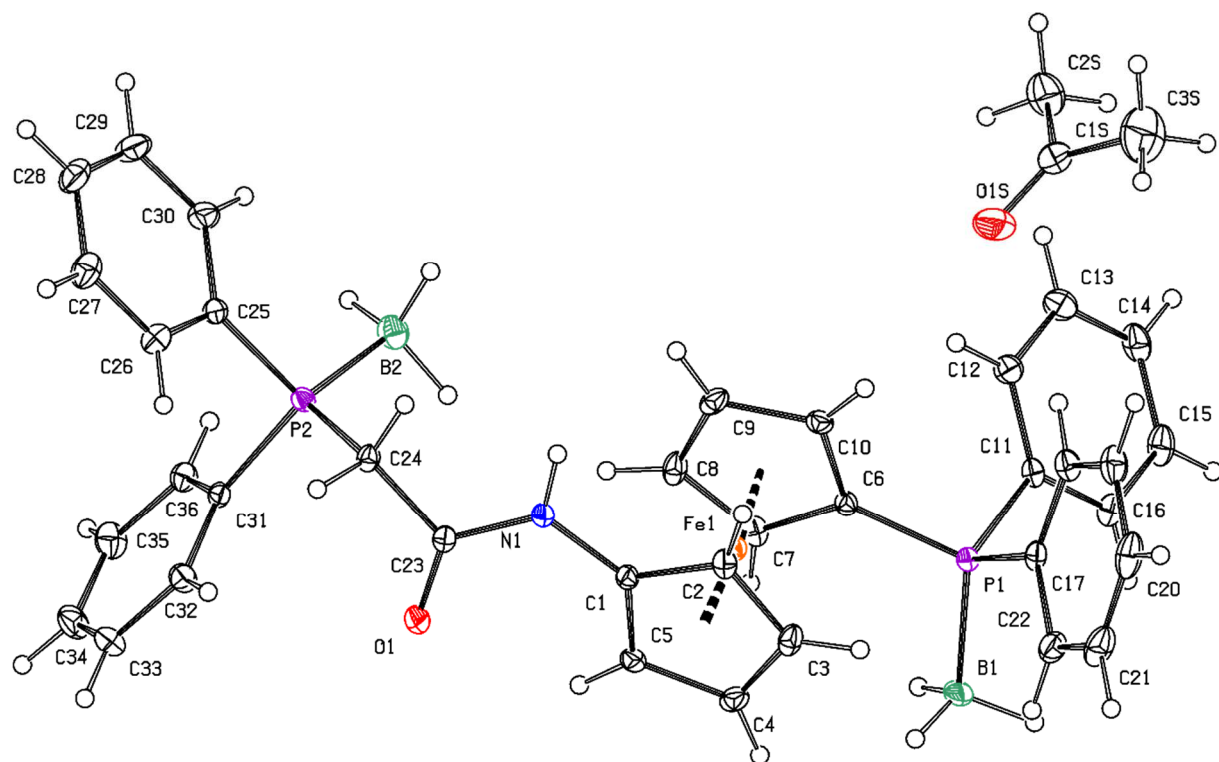

**Figure S4** PLATON plot of the structure of **3-Me<sub>2</sub>CO** showing displacement ellipsoids at the 30% probability level

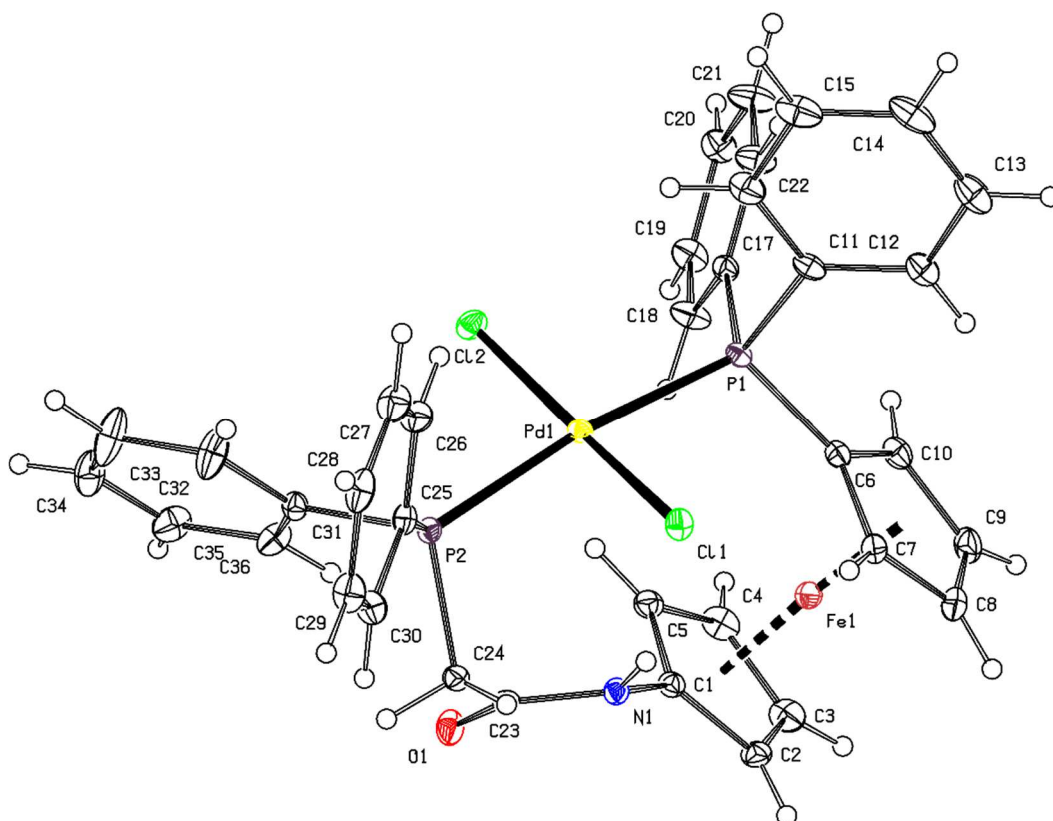

**Figure S5** PLATON plot of the structure of *trans-5* showing displacement ellipsoids at the 30% probability level

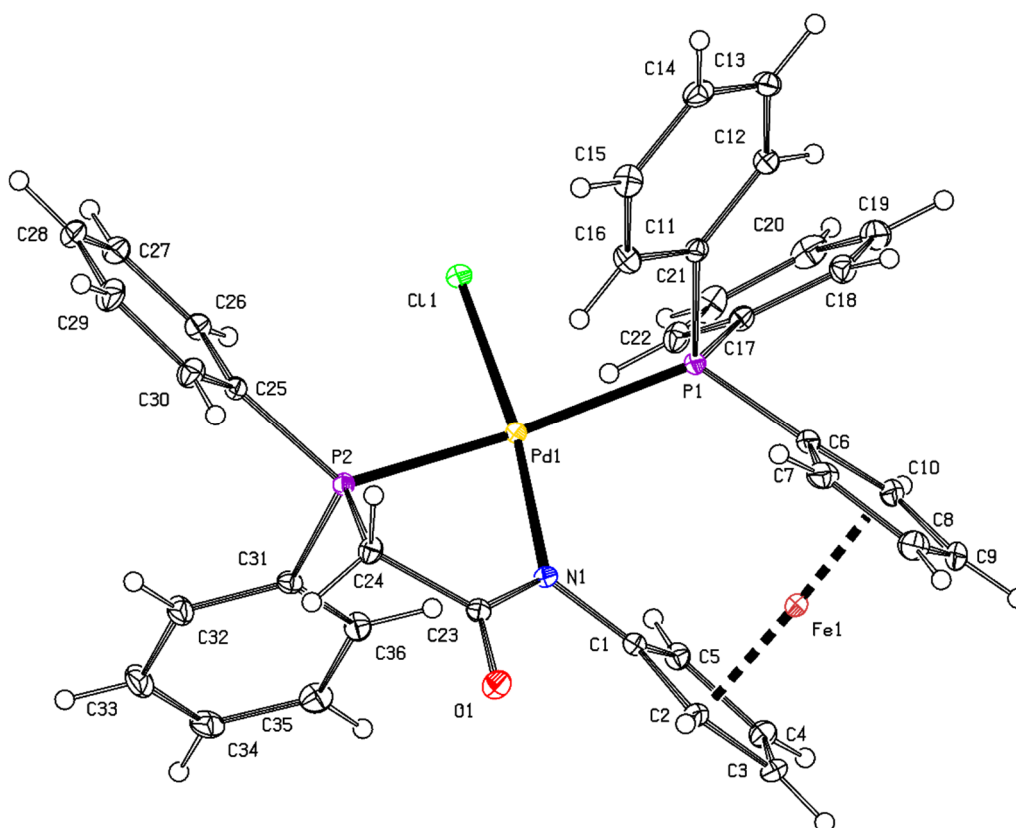

**Figure S6** PLATON plot of the structure of **6** showing displacement ellipsoids at the 30% probability level

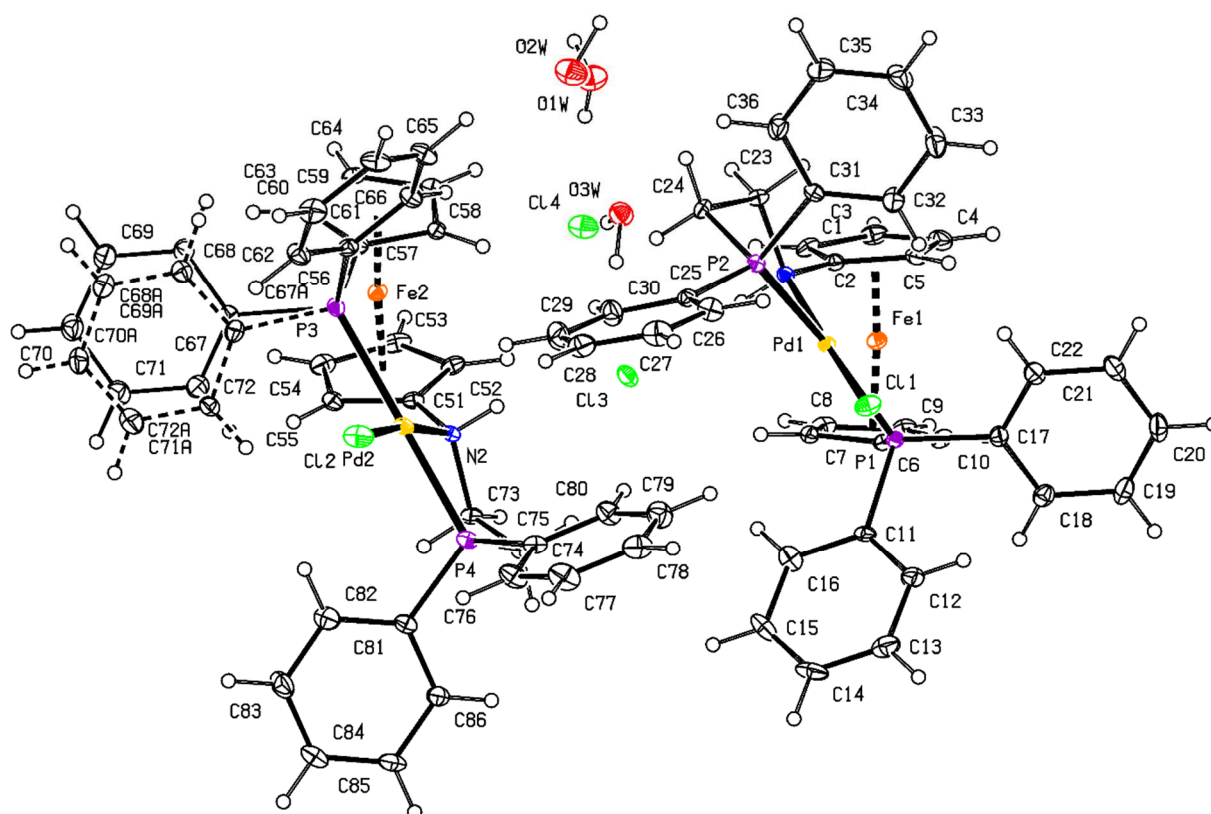

**Figure S7** PLATON plot of  $7 \cdot 1.5\text{H}_2\text{O} \cdot 0.5\text{C}_2\text{H}_4\text{Cl}_2$  showing displacement ellipsoids at the 30% probability level (the solvating 1,2-dichloroethane was removed by using PLATON/SQUEEZE)

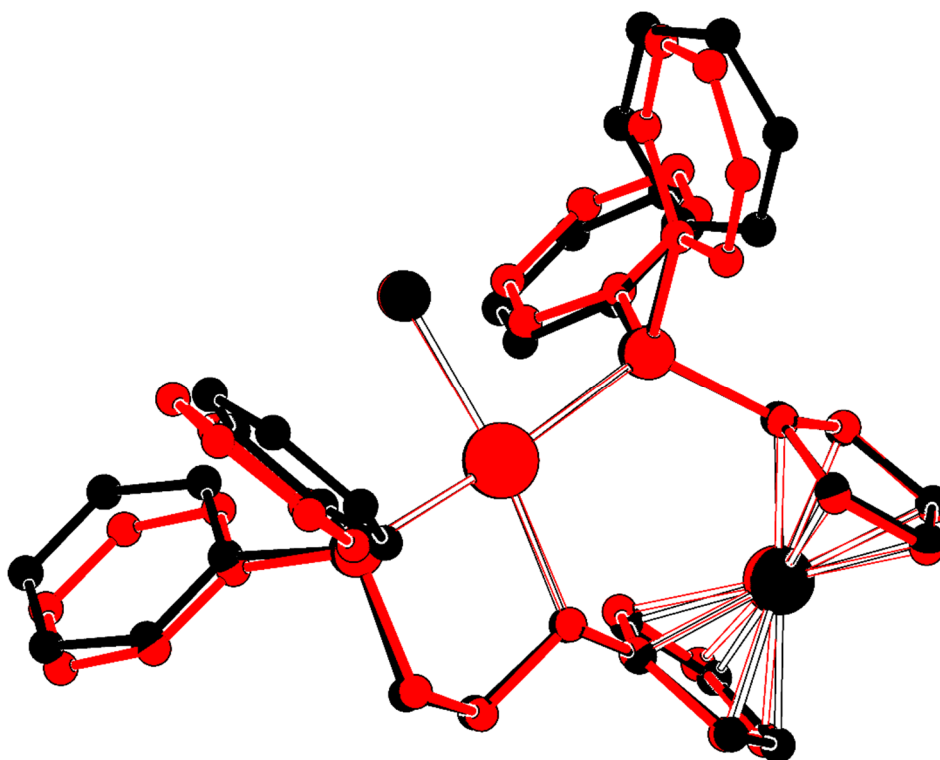

**Figure S8** Overlap of the two structurally independent complex cations in the structure of  $7 \cdot 1.5\text{H}_2\text{O} \cdot 0.5\text{C}_2\text{H}_4\text{Cl}_2$  illustrating their minor structural differences

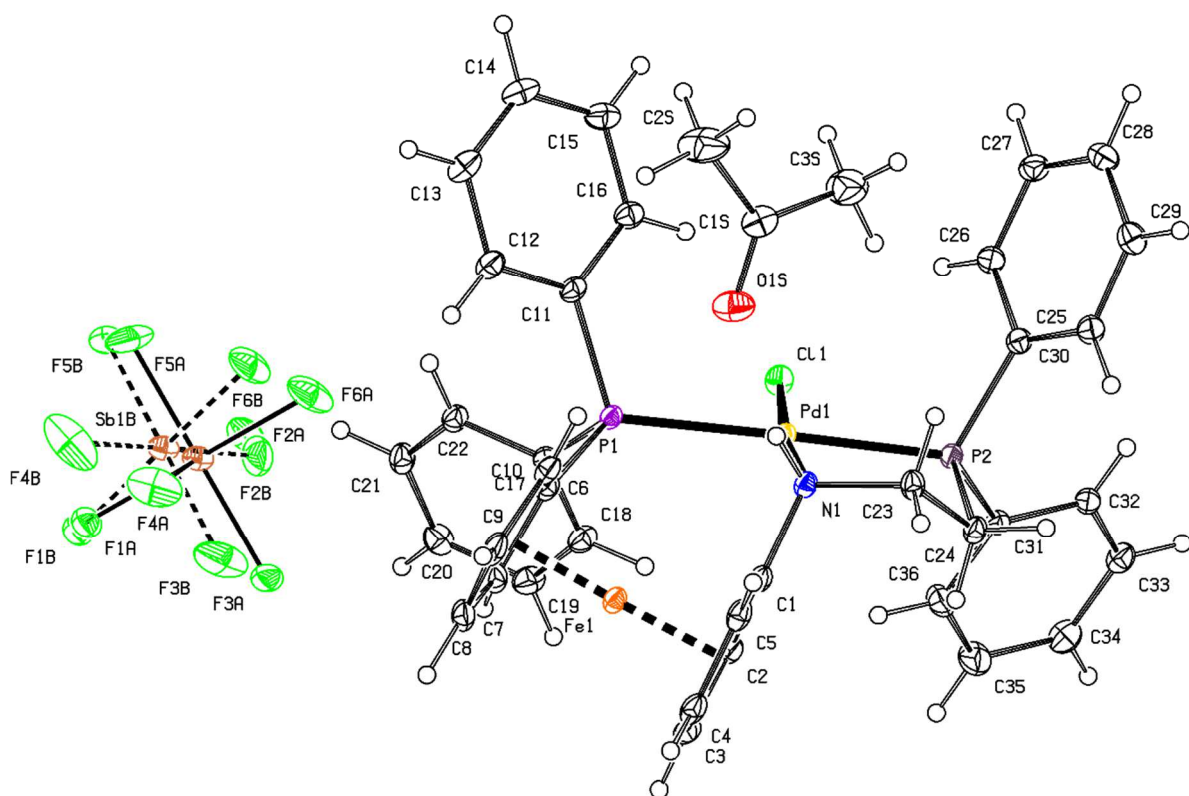

**Figure S9** PLATON plot of the structure of **8**-Me<sub>2</sub>CO showing displacement ellipsoids at the 30% probability level

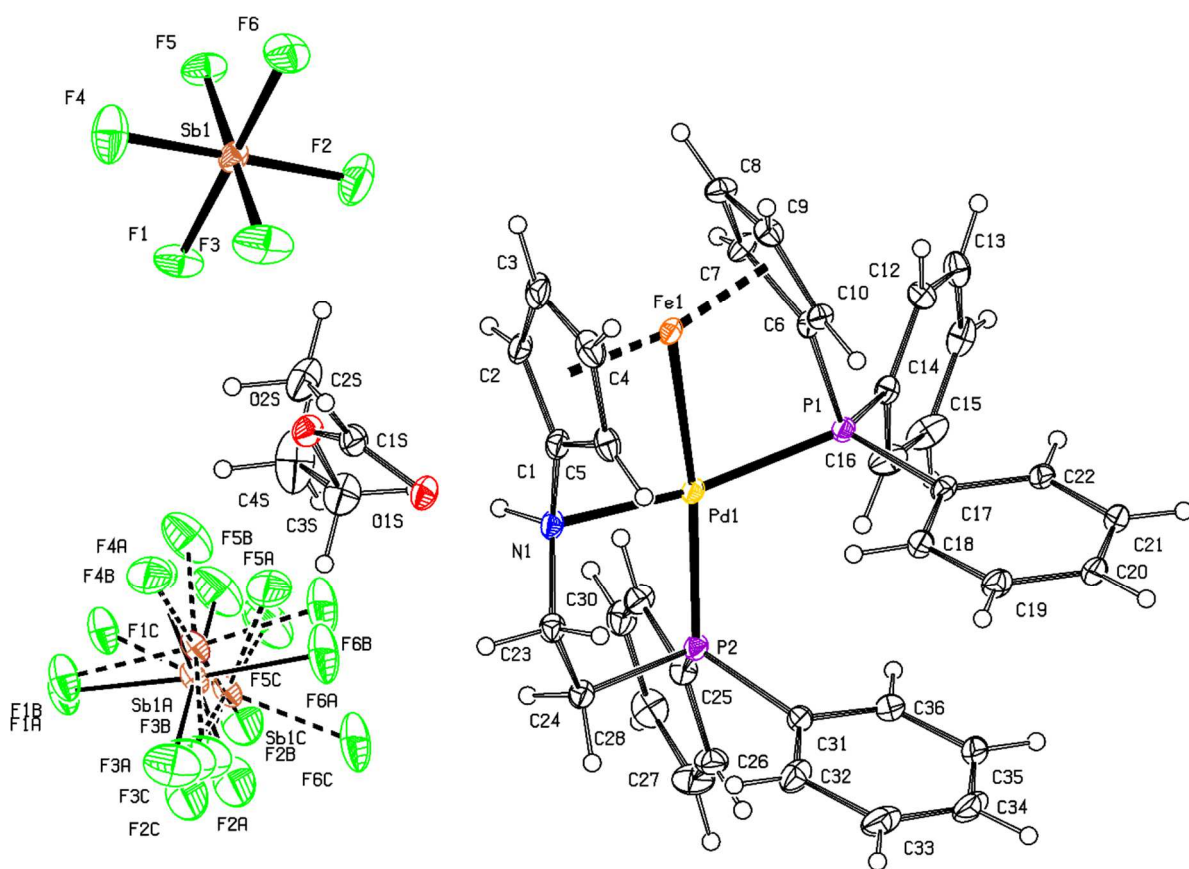

**Figure S10** PLATON plot of the structure of **9**-AcOEt showing displacement ellipsoids at the 30% probability level

**Table S1.** Selected crystallographic data and structure refinement parameters.<sup>a</sup>

| Compound                                       | <b>1</b>                                           | <b>2</b>                                          | <b>3·Me<sub>2</sub>CO</b>                                                       |
|------------------------------------------------|----------------------------------------------------|---------------------------------------------------|---------------------------------------------------------------------------------|
| Formula                                        | C <sub>36</sub> H <sub>31</sub> FeNOP <sub>2</sub> | C <sub>36</sub> H <sub>33</sub> FeNP <sub>2</sub> | C <sub>39</sub> H <sub>43</sub> B <sub>2</sub> FeNO <sub>2</sub> P <sub>2</sub> |
| <i>M</i>                                       | 611.41                                             | 597.42                                            | 697.15                                                                          |
| Crystal system                                 | monoclinic                                         | monoclinic                                        | triclinic                                                                       |
| Space group                                    | <i>P</i> 2 <sub>1</sub> / <i>c</i> (No. 14)        | <i>P</i> 2 <sub>1</sub> / <i>c</i> (No. 14)       | <i>P</i> $\bar{1}$ (No. 2)                                                      |
| <i>T</i> [K]                                   | 120(2)                                             | 120(2)                                            | 120(2)                                                                          |
| <i>a</i> [Å]                                   | 12.0438(3)                                         | 16.6110(8)                                        | 8.7618(3)                                                                       |
| <i>b</i> [Å]                                   | 25.9455(6)                                         | 6.0131(2)                                         | 13.7584(6)                                                                      |
| <i>c</i> [Å]                                   | 9.4329(2)                                          | 29.413(1)                                         | 15.5032(6)                                                                      |
| $\alpha$ [°]                                   |                                                    |                                                   | 74.449(1)                                                                       |
| $\beta$ [°]                                    | 96.276(1)                                          | 96.128(2)                                         | 80.315(1)                                                                       |
| $\gamma$ [°]                                   |                                                    |                                                   | 80.869(1)                                                                       |
| <i>V</i> [Å <sup>3</sup> ]                     | 2930.0(1)                                          | 2921.1(2)                                         | 1762.1(1)                                                                       |
| <i>Z</i>                                       | 4                                                  | 4                                                 | 2                                                                               |
| $\mu$ (Mo K $\alpha$ ) [mm <sup>-1</sup> ]     | 0.71073                                            | 0.71073                                           | 0.71073                                                                         |
| Diffns collected                               | 34618                                              | 84577                                             | 36825                                                                           |
| Independent diffns                             | 6711                                               | 6704                                              | 8068                                                                            |
| Observed <sup>a</sup> diffns                   | 6068                                               | 6444                                              | 7737                                                                            |
| <i>R</i> <sub>int</sub> <sup>b</sup> [%]       | 3.14                                               | 3.36                                              | 1.91                                                                            |
| No. of parameters                              | 370                                                | 361                                               | 426                                                                             |
| <i>R</i> <sup>b</sup> obsd diffns [%]          | 3.52                                               | 4.47                                              | 3.04                                                                            |
| <i>R</i> , <i>wR</i> <sup>b</sup> all data [%] | 4.03, 8.04                                         | 4.62, 10.70                                       | 3.17, 7.24                                                                      |
| $\Delta\rho$ [e Å <sup>-3</sup> ]              | 0.43, -0.26                                        | 1.44, -0.61                                       | 0.60, -0.47                                                                     |

<sup>a</sup> Diffractions with  $I > 2\sigma(I)$ . <sup>b</sup> Definitions:  $R_{\text{int}} = \Sigma |F_o^2 - F_o^2(\text{mean})| / \Sigma F_o^2$ , where  $F_o^2(\text{mean})$  is the average intensity of symmetry-equivalent diffractions.  $R = \Sigma ||F_o| - |F_c|| / \Sigma |F_o|$ ,  $wR = [\Sigma \{w(F_o^2 - F_c^2)^2\} / \Sigma w(F_o^2)^2]^{1/2}$ .

**Table S1 continued**

| Compound                                       | <b>5</b>                                                              | <b>6</b>                                                |
|------------------------------------------------|-----------------------------------------------------------------------|---------------------------------------------------------|
| Formula                                        | C <sub>36</sub> H <sub>31</sub> Cl <sub>2</sub> FeNOP <sub>2</sub> Pd | C <sub>36</sub> H <sub>30</sub> ClFeNOP <sub>2</sub> Pd |
| <i>M</i>                                       | 788.71                                                                | 752.25                                                  |
| Crystal system                                 | triclinic                                                             | triclinic                                               |
| Space group                                    | <i>P</i> $\bar{1}$ (No. 2)                                            | <i>P</i> $\bar{1}$ (No. 2)                              |
| <i>T</i> [K]                                   | 120(2)                                                                | 120(2)                                                  |
| <i>a</i> [Å]                                   | 9.7041(3)                                                             | 11.3016(6)                                              |
| <i>b</i> [Å]                                   | 10.3958(3)                                                            | 12.1891(7)                                              |
| <i>c</i> [Å]                                   | 16.2586(5)                                                            | 12.2831(6)                                              |
| $\alpha$ [°]                                   | 91.820(1)                                                             | 72.935(2)                                               |
| $\beta$ [°]                                    | 94.537(1)                                                             | 88.173(2)                                               |
| $\gamma$ [°]                                   | 99.729(1)                                                             | 72.517(2)                                               |
| <i>V</i> [Å] <sup>3</sup>                      | 1609.84(8)                                                            | 1540.1(1)                                               |
| <i>Z</i>                                       | 2                                                                     | 2                                                       |
| $\mu$ (Mo K $\alpha$ ) [mm <sup>-1</sup> ]     | 0.71073                                                               | 0.71073                                                 |
| Diffns collected                               | 29635                                                                 | 24893                                                   |
| Independent diffns                             | 7374                                                                  | 7002                                                    |
| Observed <sup>a</sup> diffns                   | 6866                                                                  | 6779                                                    |
| <i>R</i> <sub>int</sub> <sup>b</sup> [%]       | 2.02                                                                  | 2.48                                                    |
| No. of parameters                              | 397                                                                   | 388                                                     |
| <i>R</i> <sup>b</sup> obsd diffns [%]          | 1.98                                                                  | 2.22                                                    |
| <i>R</i> , <i>wR</i> <sup>b</sup> all data [%] | 2.24, 4.72                                                            | 2.29, 5.80                                              |
| $\Delta\rho$ [e Å <sup>-3</sup> ]              | 0.41, -0.46                                                           | 0.86, -0.75                                             |



**Table S1 continued**

| Compound                                       | <b>7</b> · <sup>3</sup> / <sub>2</sub> H <sub>2</sub> O· <sup>1</sup> / <sub>2</sub> DCE | <b>8</b> ·Me <sub>2</sub> CO                                             | <b>9</b> ·AcOEt                                                                                    |
|------------------------------------------------|------------------------------------------------------------------------------------------|--------------------------------------------------------------------------|----------------------------------------------------------------------------------------------------|
| Formula                                        | C <sub>37</sub> H <sub>38</sub> Cl <sub>3</sub> FeNO <sub>1.5</sub> P <sub>2</sub> Pd    | C <sub>39</sub> H <sub>39</sub> ClF <sub>6</sub> FeNOP <sub>2</sub> PdSb | C <sub>40</sub> H <sub>41</sub> F <sub>12</sub> FeNO <sub>2</sub> P <sub>2</sub> PdSb <sub>2</sub> |
| <i>M</i>                                       | 851.22                                                                                   | 1033.10                                                                  | 1263.43                                                                                            |
| Crystal system                                 | orthorhombic                                                                             | monoclinic                                                               | triclinic                                                                                          |
| Space group                                    | <i>P</i> 2 <sub>1</sub> 2 <sub>1</sub> 2 <sub>1</sub> (No. 19) <sup>c</sup>              | <i>P</i> 2 <sub>1</sub> / <i>n</i> (No. 14)                              | <i>P</i> $\bar{1}$ (No. 2)                                                                         |
| <i>T</i> [K]                                   | 120(2)                                                                                   | 120(2)                                                                   | 120(2)                                                                                             |
| <i>a</i> [Å]                                   | 14.6271(3)                                                                               | 10.6187(6)                                                               | 10.8320(8)                                                                                         |
| <i>b</i> [Å]                                   | 19.8015(4)                                                                               | 15.764(1)                                                                | 13.509(1)                                                                                          |
| <i>c</i> [Å]                                   | 25.4081(5)                                                                               | 23.902(2)                                                                | 15.898(1)                                                                                          |
| $\alpha$ [°]                                   |                                                                                          |                                                                          | 95.401(3)                                                                                          |
| $\beta$ [°]                                    |                                                                                          | 101.945(2)                                                               | 107.996(3)                                                                                         |
| $\gamma$ [°]                                   |                                                                                          |                                                                          | 91.805(3)                                                                                          |
| <i>V</i> [Å] <sup>3</sup>                      | 7359.2(3)                                                                                | 3914.5(4)                                                                | 2198.2(3)                                                                                          |
| <i>Z</i>                                       | 8                                                                                        | 4                                                                        | 2                                                                                                  |
| $\mu$ (Mo K $\alpha$ ) [mm <sup>-1</sup> ]     | 0.71073                                                                                  | 0.71073                                                                  | 0.71073                                                                                            |
| Diffns collected                               | 75501                                                                                    | 223757                                                                   | 89267                                                                                              |
| Independent diffns                             | 16834                                                                                    | 9004                                                                     | 10139                                                                                              |
| Observed <sup>a</sup> diffns                   | 16087                                                                                    | 8406                                                                     | 9435                                                                                               |
| <i>R</i> <sub>int</sub> <sup>b</sup> [%]       | 3.55                                                                                     | 3.44                                                                     | 3.59                                                                                               |
| No. of parameters                              | 833                                                                                      | 532                                                                      | 597                                                                                                |
| <i>R</i> <sup>b</sup> obsd diffns [%]          | 2.43                                                                                     | 2.54                                                                     | 5.54                                                                                               |
| <i>R</i> , <i>wR</i> <sup>b</sup> all data [%] | 2.67, 4.66                                                                               | 2.79, 5.15                                                               | 5.94, 13.42                                                                                        |
| $\Delta\rho$ [e Å <sup>-3</sup> ]              | 0.43, -0.32                                                                              | 0.76, -0.85                                                              | 1.40, -1.55                                                                                        |

<sup>c</sup> Flack's enantiomorph parameter: -0.006(5).

## Copies of the NMR and MS spectra

(Note: solvent signals in the NMR spectra are denoted by an asterisk.)

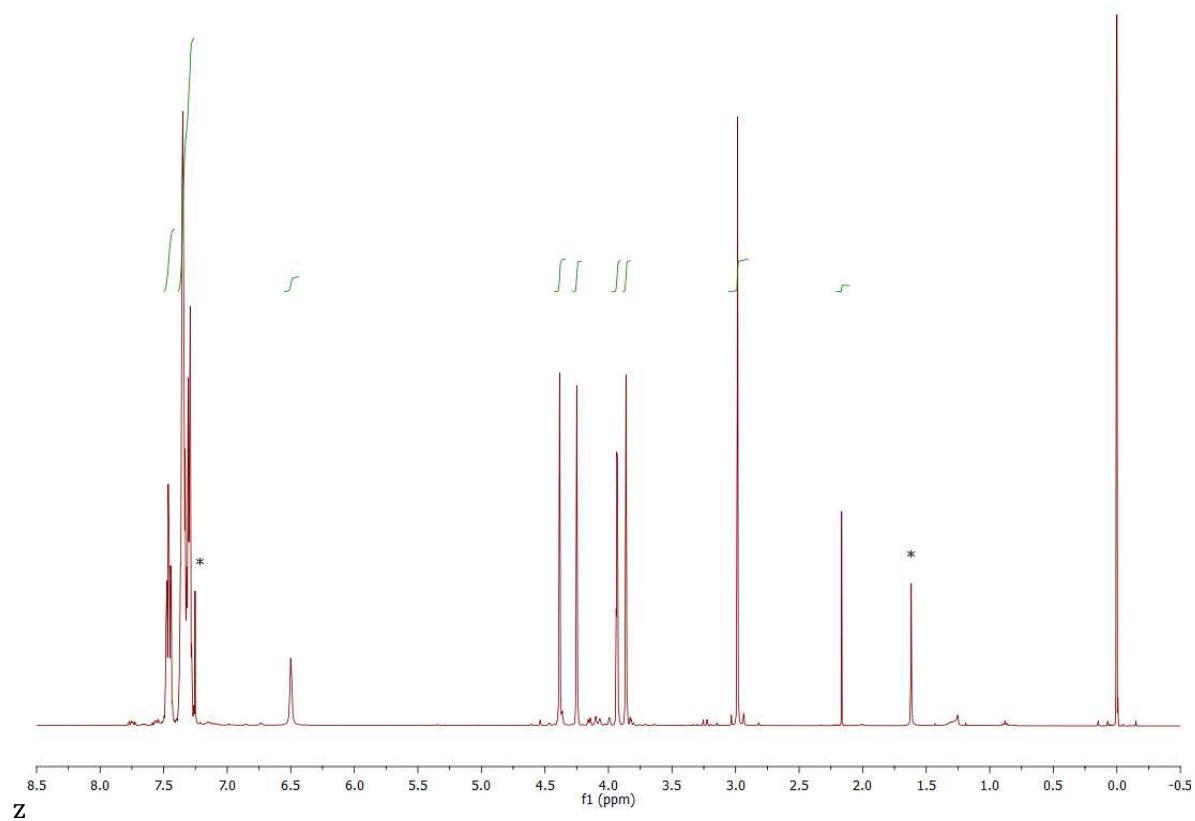

**Figure S11**  $^1\text{H}$  NMR spectrum (400 MHz,  $\text{CDCl}_3$ ) of **1**

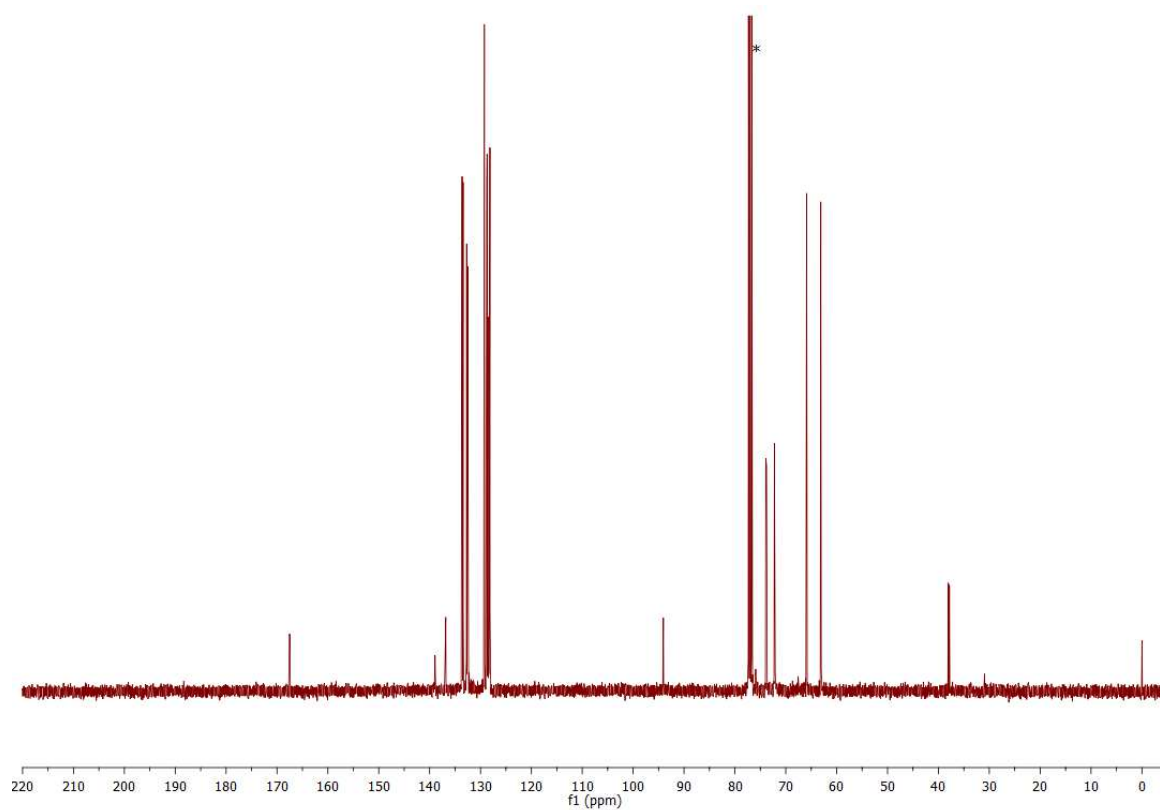

**Figure S12**  $^{13}\text{C}\{^1\text{H}\}$  NMR spectrum (101 MHz,  $\text{CDCl}_3$ ) of **1**

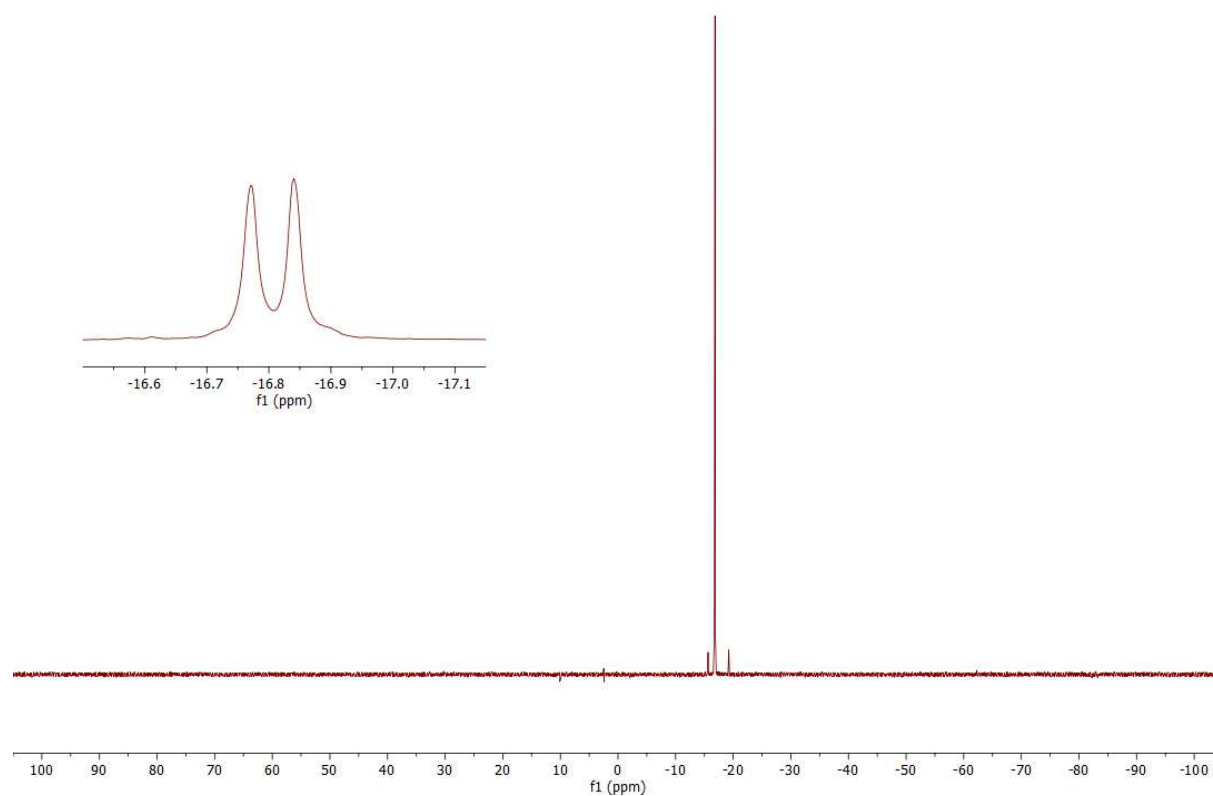

**Figure S13**  $^{31}\text{P}\{^1\text{H}\}$  NMR spectrum (162 MHz,  $\text{CDCl}_3$ ) of **1**

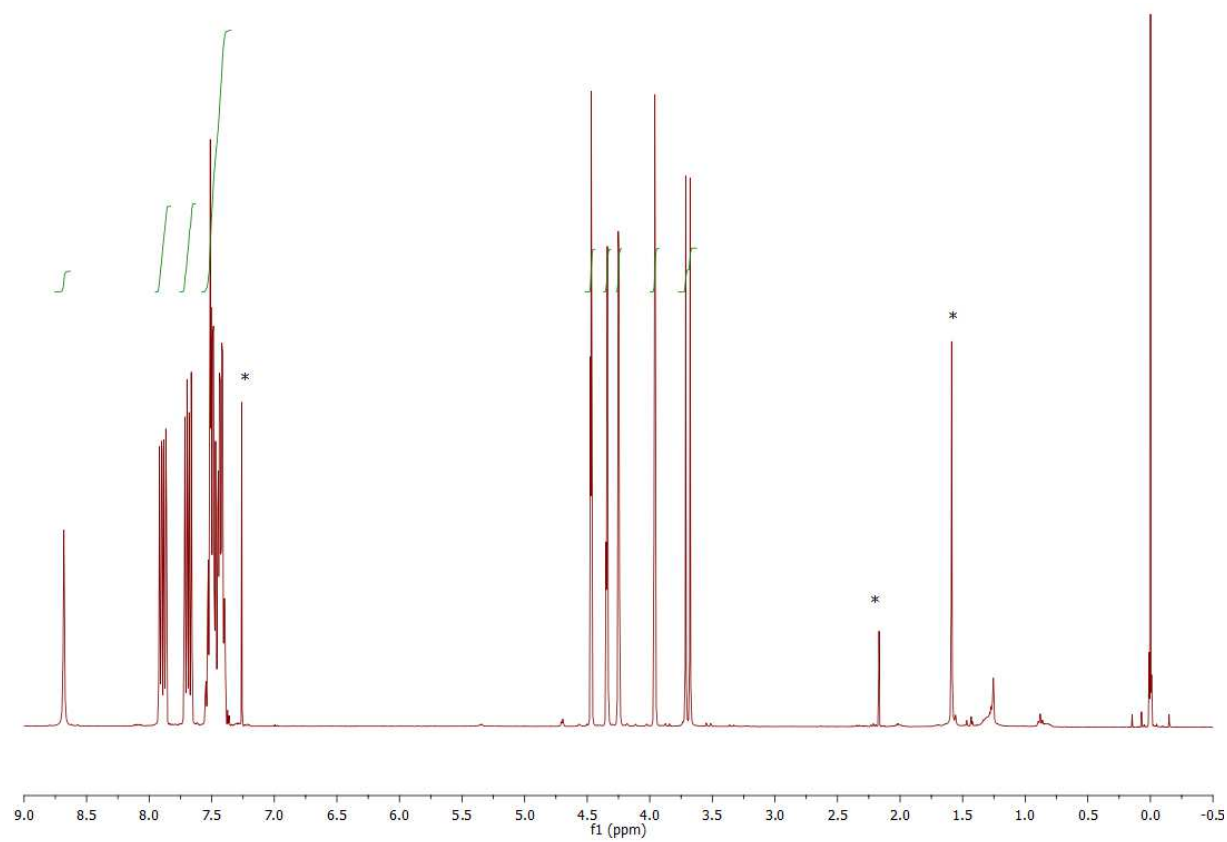

**Figure S14**  $^1\text{H}$  NMR spectrum (400 MHz,  $\text{CDCl}_3$ ) of **1-*Se***

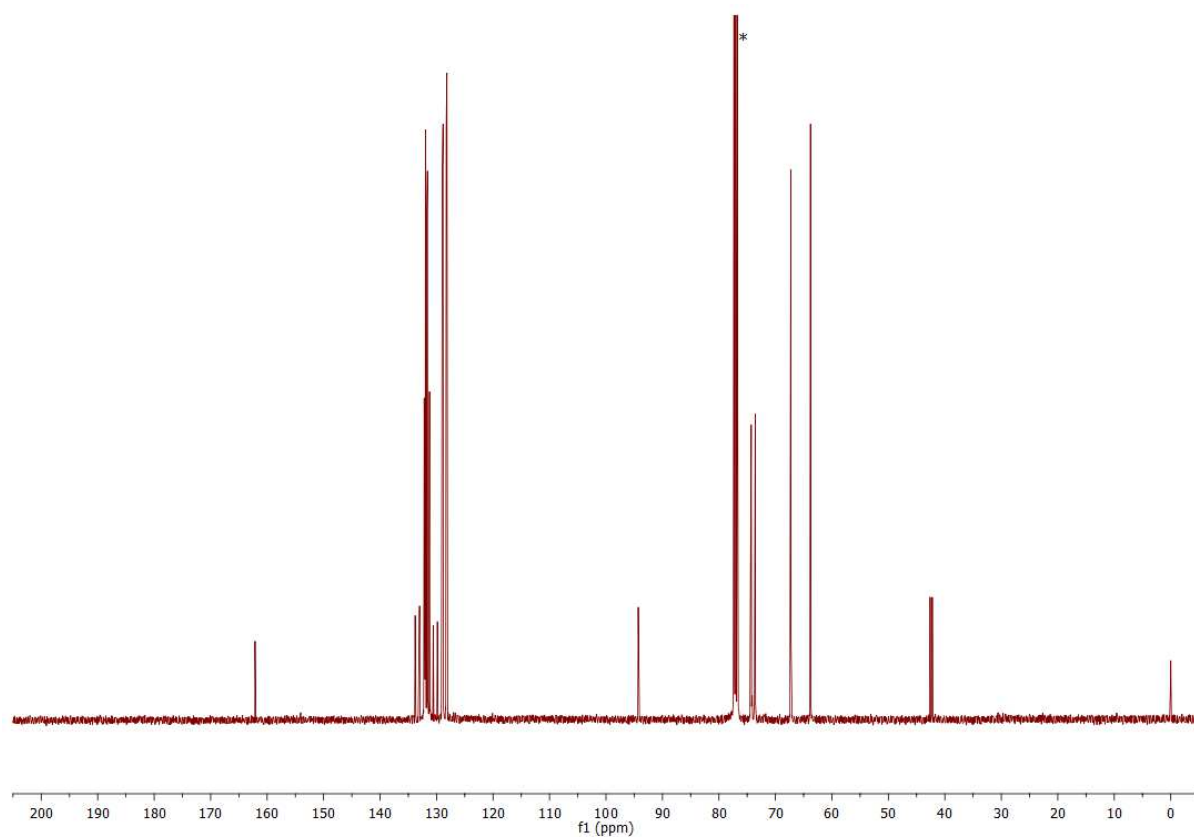

**Figure S15**  $^{13}\text{C}\{^1\text{H}\}$  NMR spectrum (101 MHz,  $\text{CDCl}_3$ ) of **1-Se**

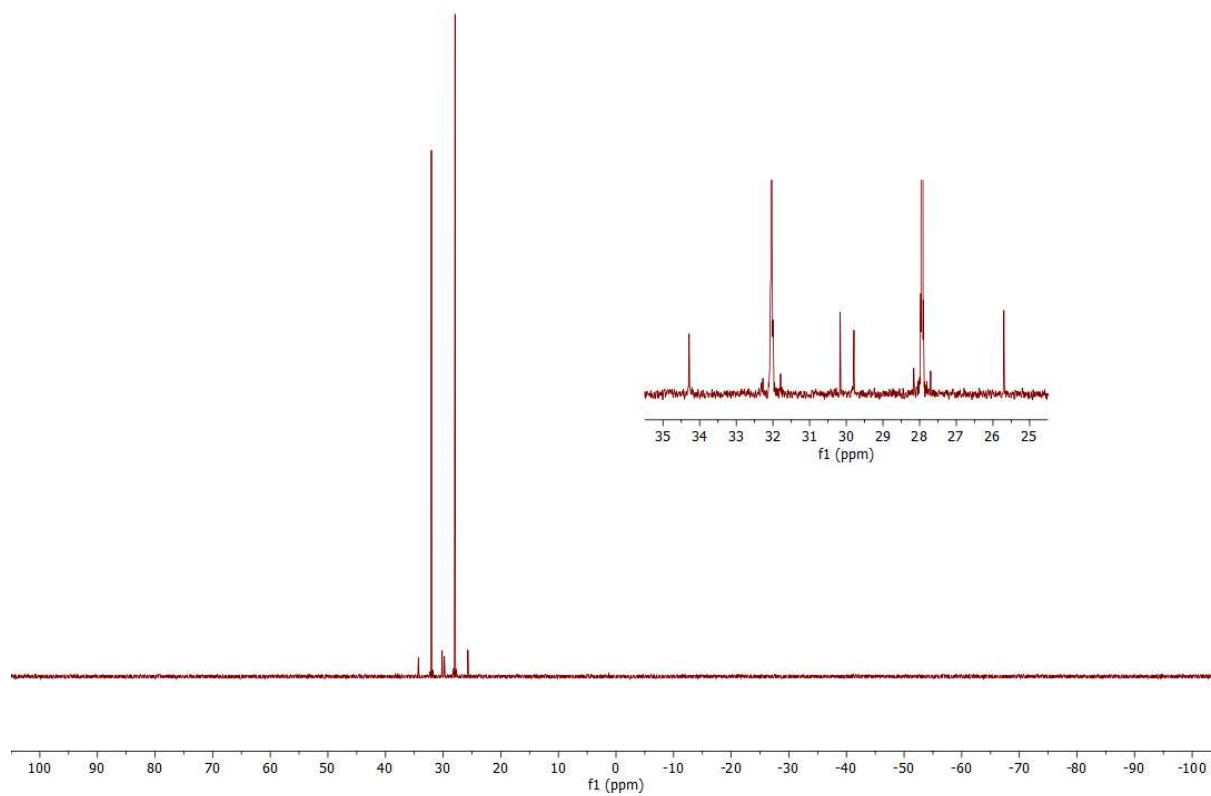

**Figure S16**  $^{31}\text{P}\{^1\text{H}\}$  NMR spectrum (162 MHz,  $\text{CDCl}_3$ ) of **1-Se**

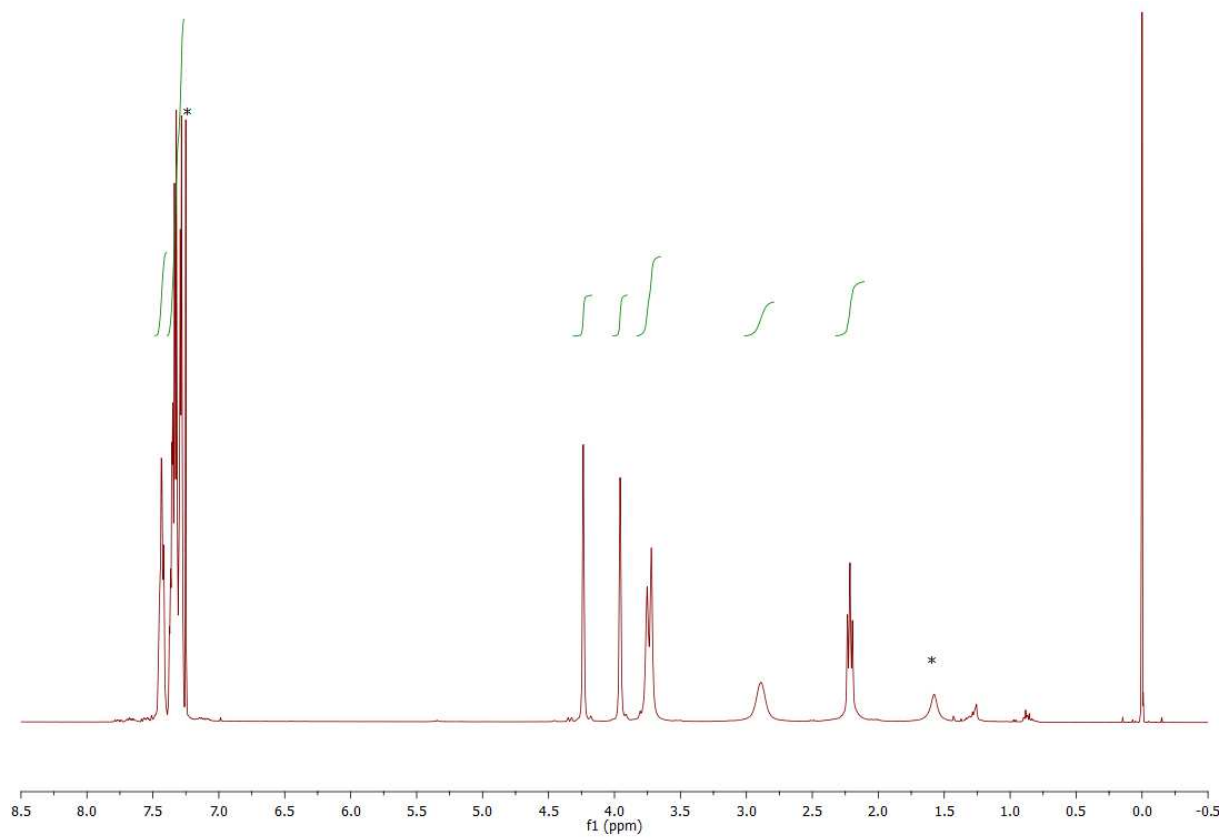

**Figure S17**  $^1\text{H}$  NMR spectrum (400 MHz,  $\text{CDCl}_3$ ) of **2**

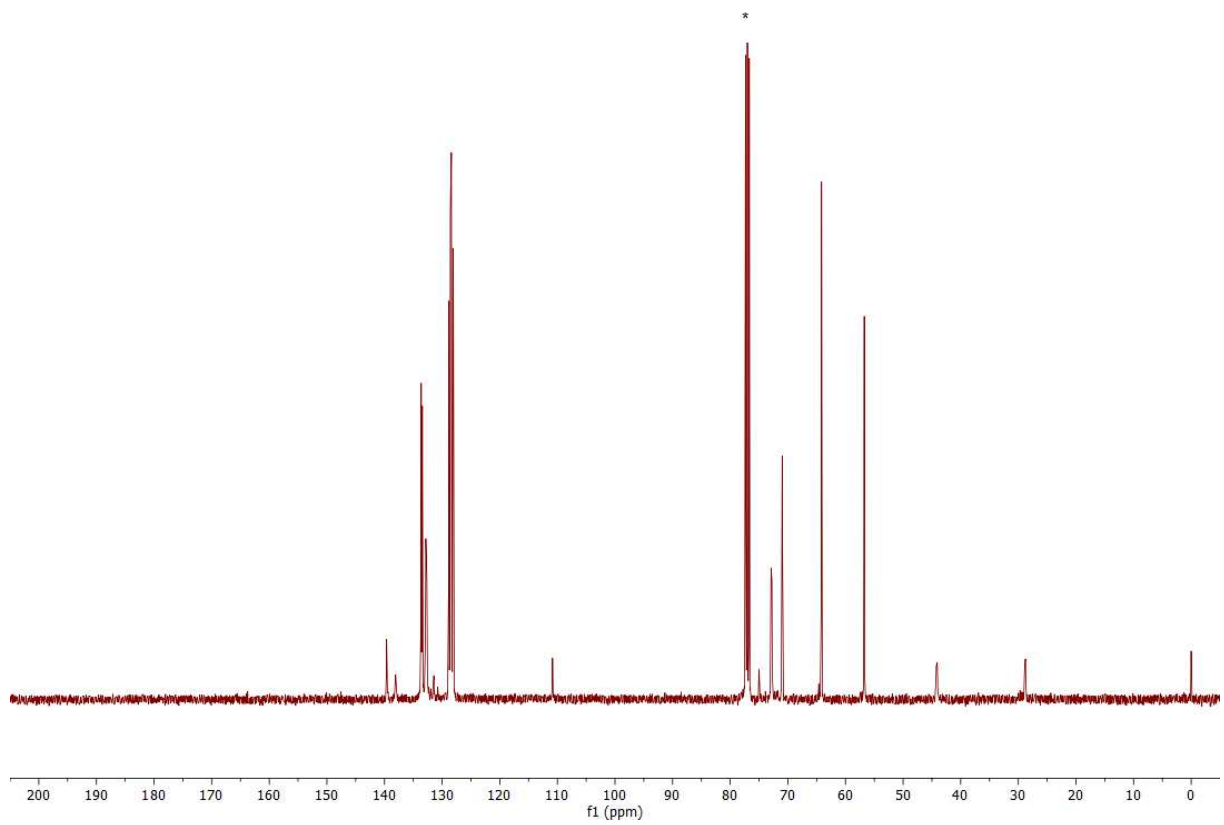

**Figure S18**  $^{13}\text{C}\{^1\text{H}\}$  NMR spectrum (101 MHz,  $\text{CDCl}_3$ ) of **2**

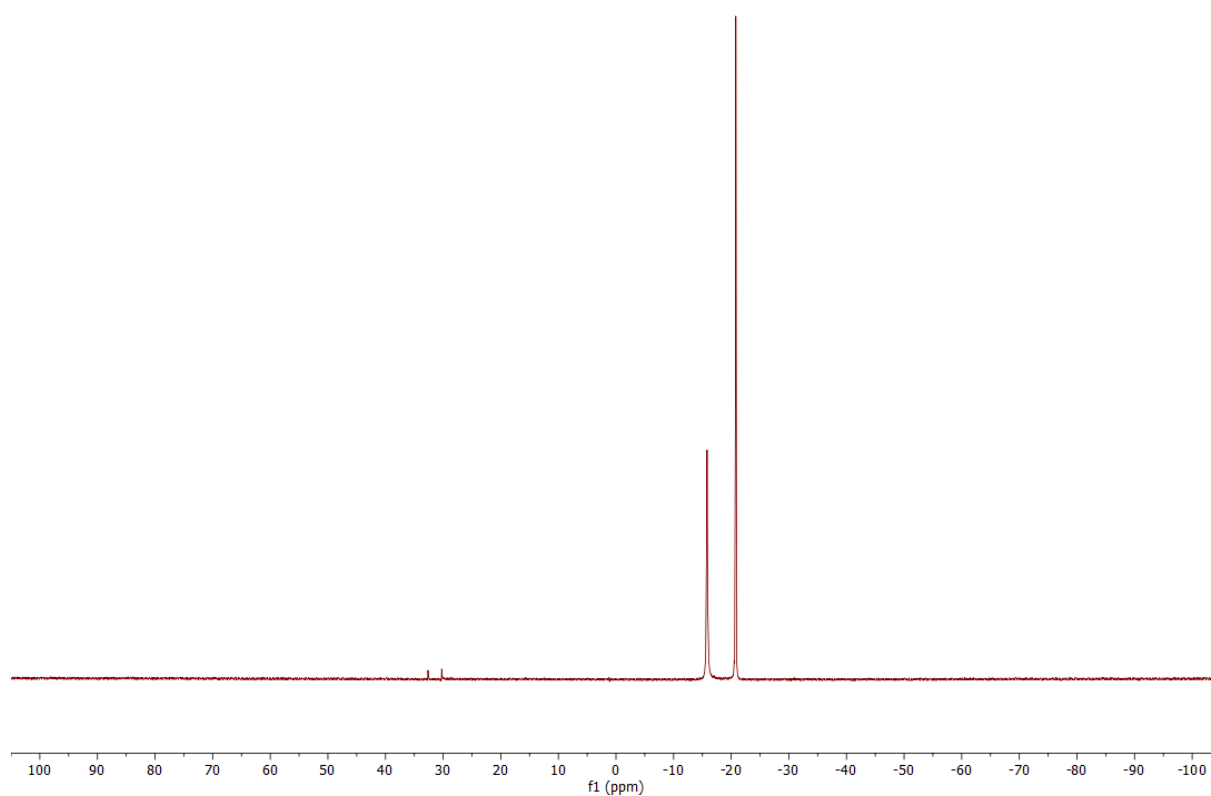

**Figure S19**  $^{31}\text{P}\{^1\text{H}\}$  NMR spectrum (162 MHz,  $\text{CDCl}_3$ ) of **2**

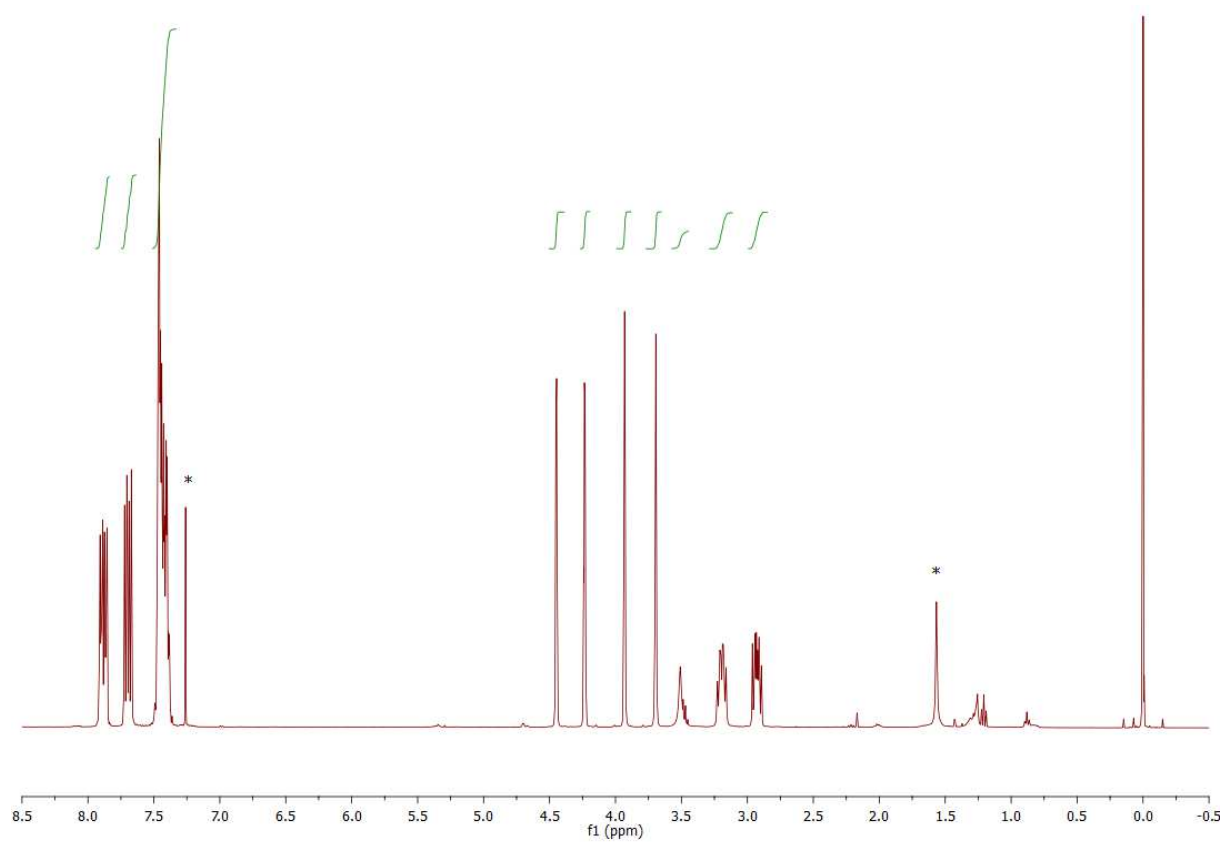

**Figure S20**  $^1\text{H}$  NMR spectrum (400 MHz,  $\text{CDCl}_3$ ) of **2-Se**

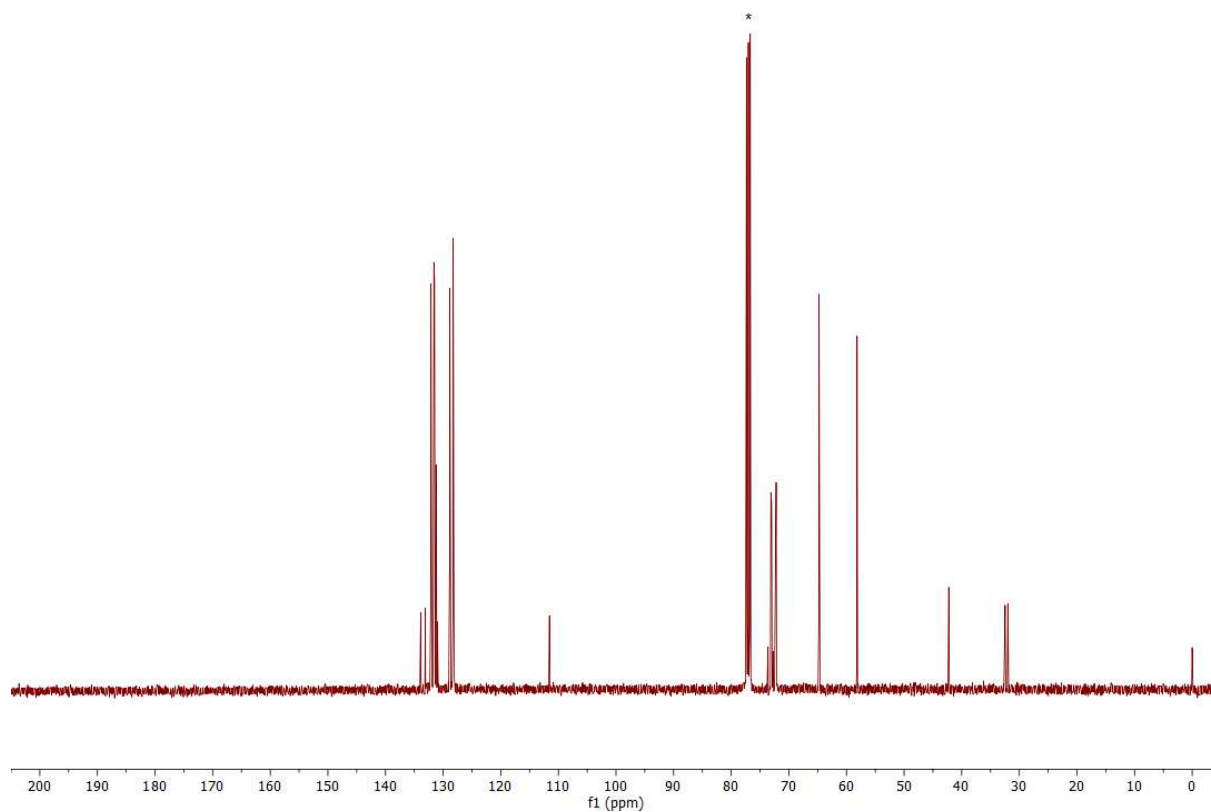

**Figure S21**  $^{13}\text{C}\{^1\text{H}\}$  NMR spectrum (101 MHz,  $\text{CDCl}_3$ ) of **2-Se**

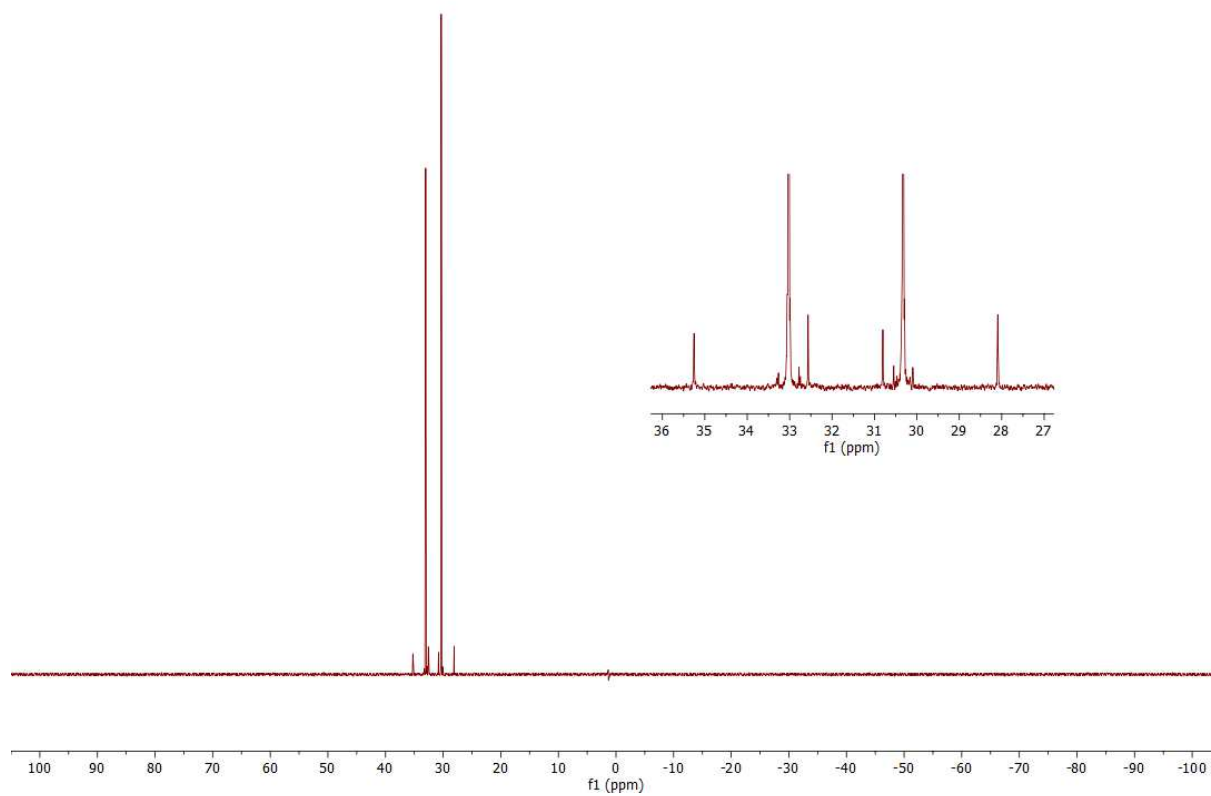

**Figure S22**  $^{31}\text{P}\{^1\text{H}\}$  NMR spectrum (162 MHz,  $\text{CDCl}_3$ ) of **2-Se**

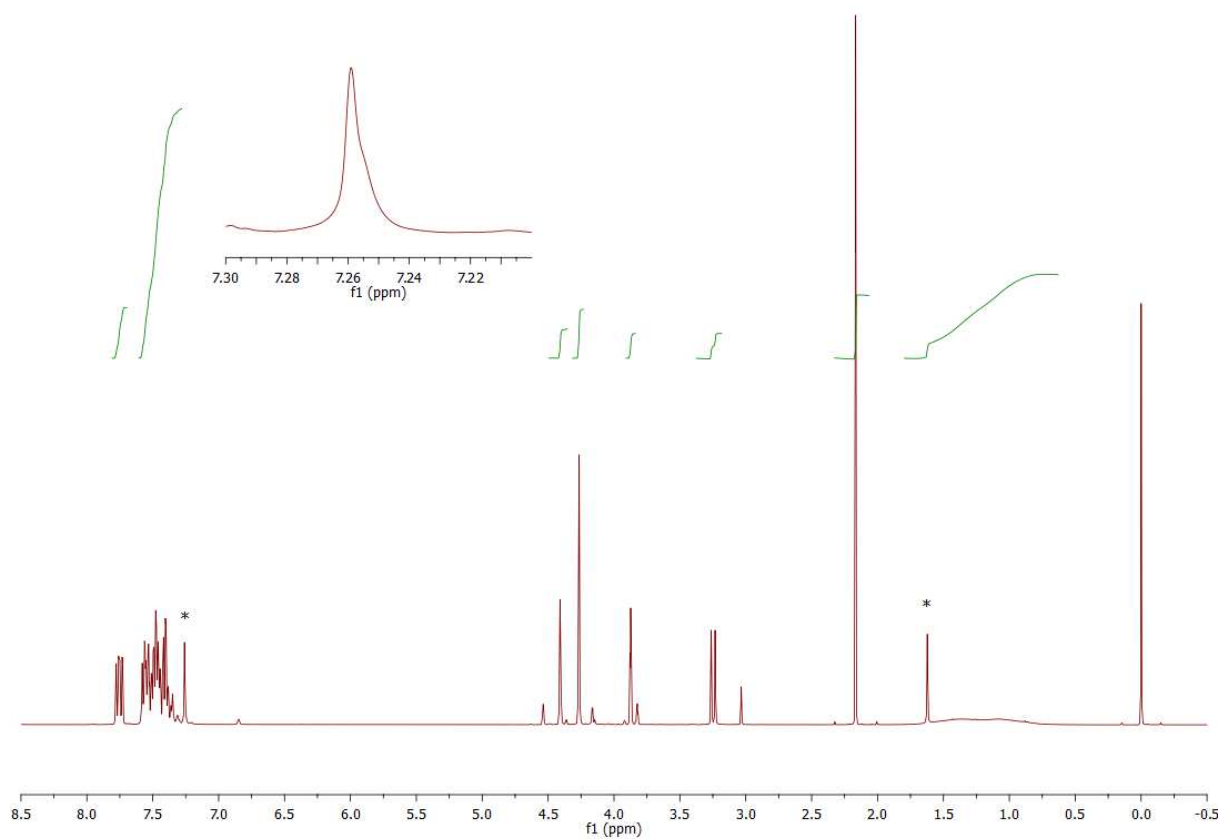

**Figure S23**  $^1\text{H}$  NMR spectrum (400 MHz,  $\text{CDCl}_3$ ) of **3**

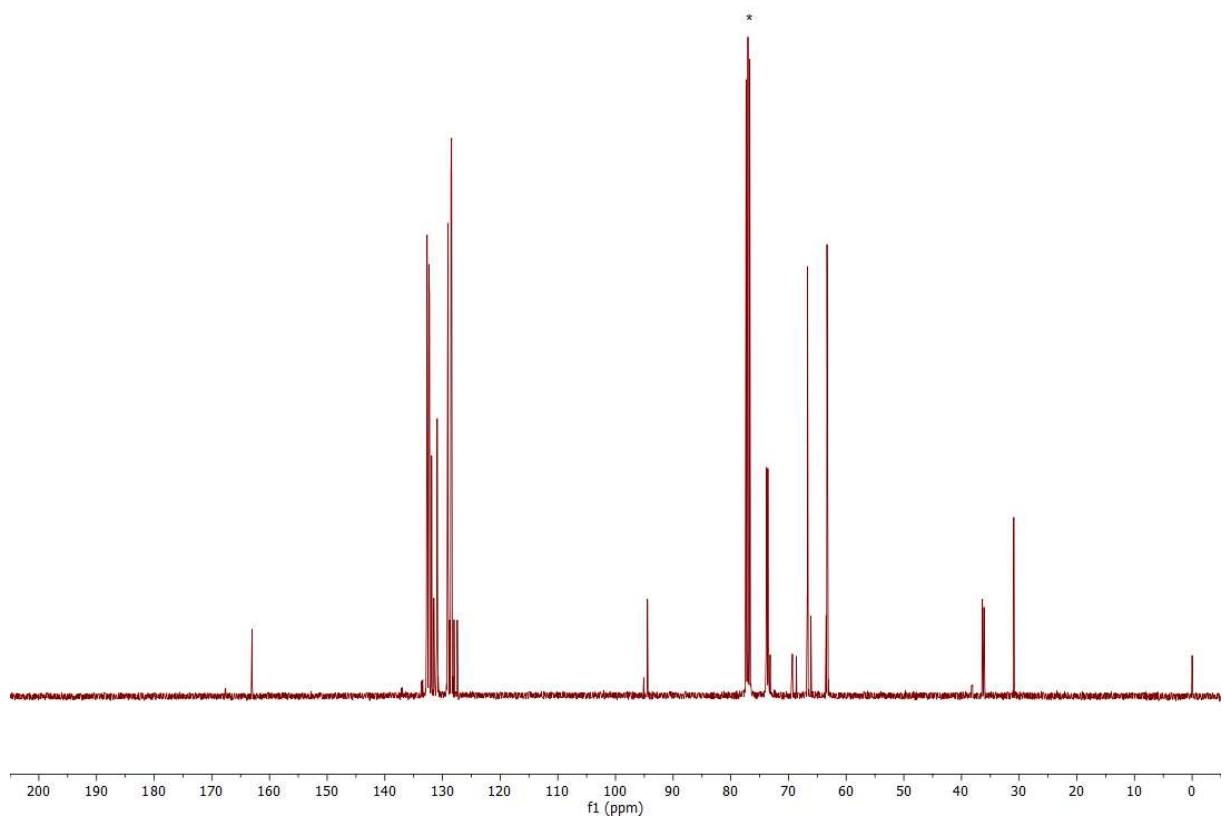

**Figure S24**  $^{13}\text{C}\{^1\text{H}\}$  NMR spectrum (101 MHz,  $\text{CDCl}_3$ ) of **3**



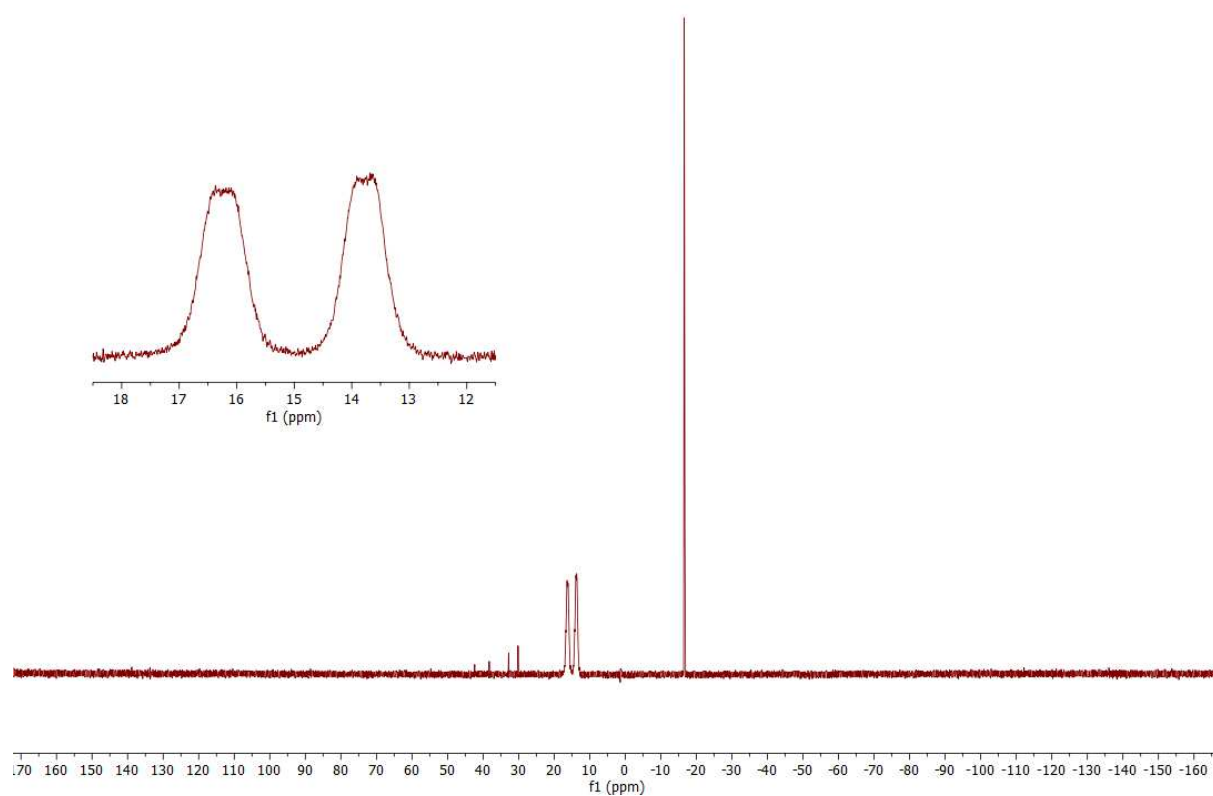

**Figure S25**  $^{31}\text{P}\{^1\text{H}\}$  NMR spectrum (162 MHz,  $\text{CDCl}_3$ ) of **3**

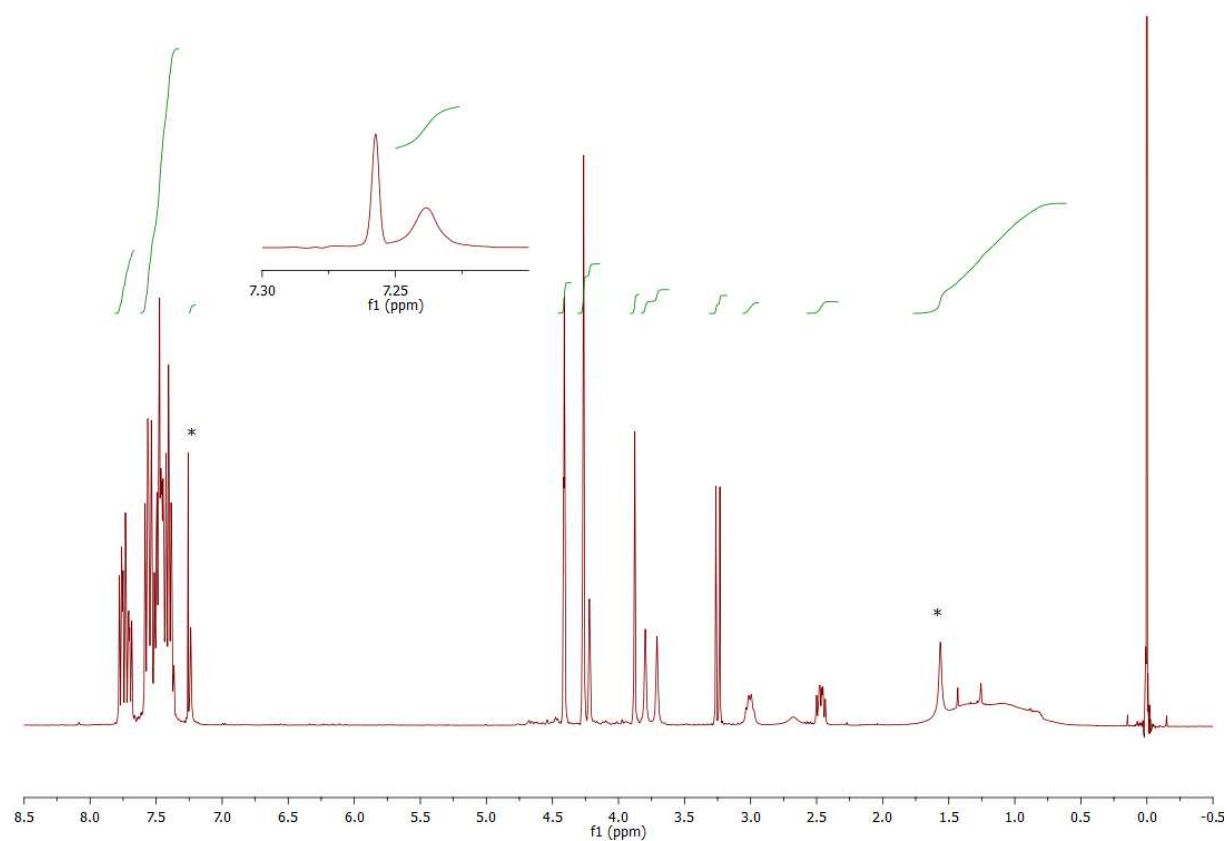

**Figure S26**  $^1\text{H}$  NMR spectrum (400 MHz,  $\text{CDCl}_3$ ) of **4**

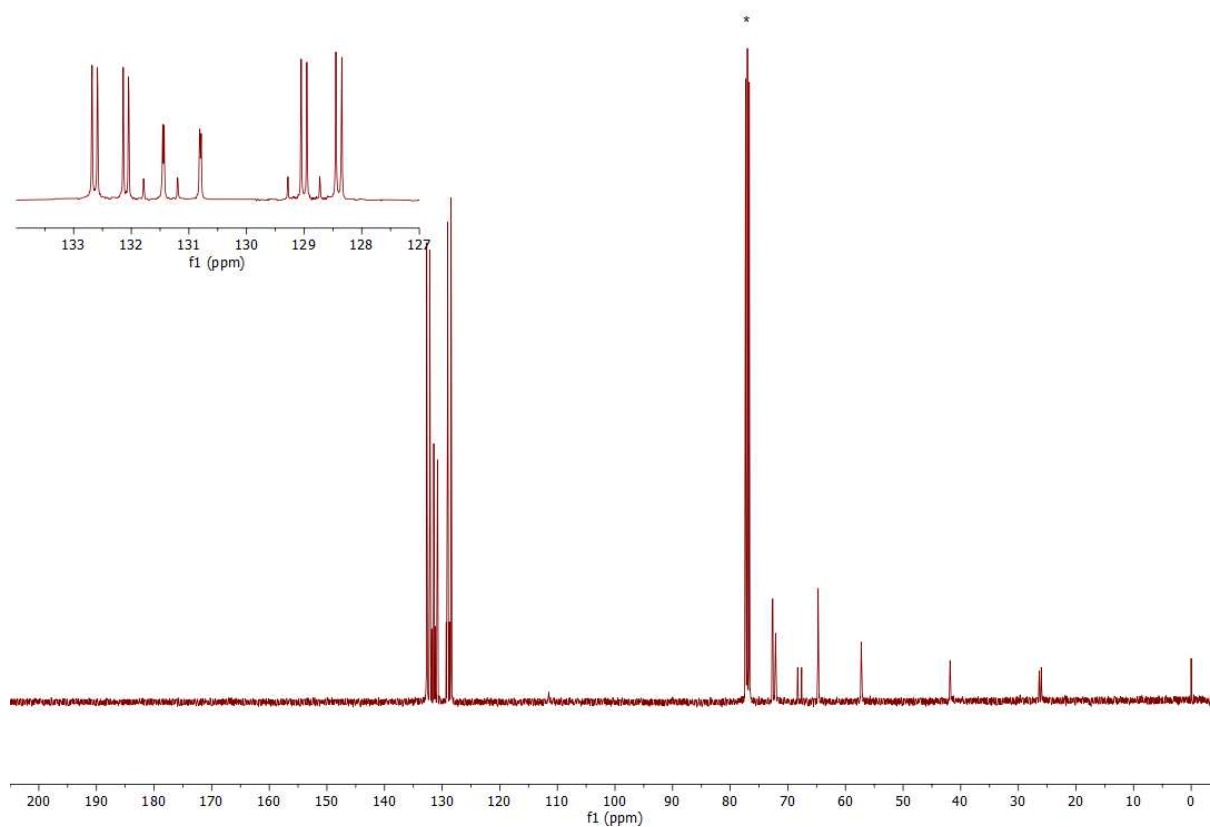

**Figure S27**  $^{13}\text{C}\{^1\text{H}\}$  NMR spectrum (101 MHz,  $\text{CDCl}_3$ ) of **4**

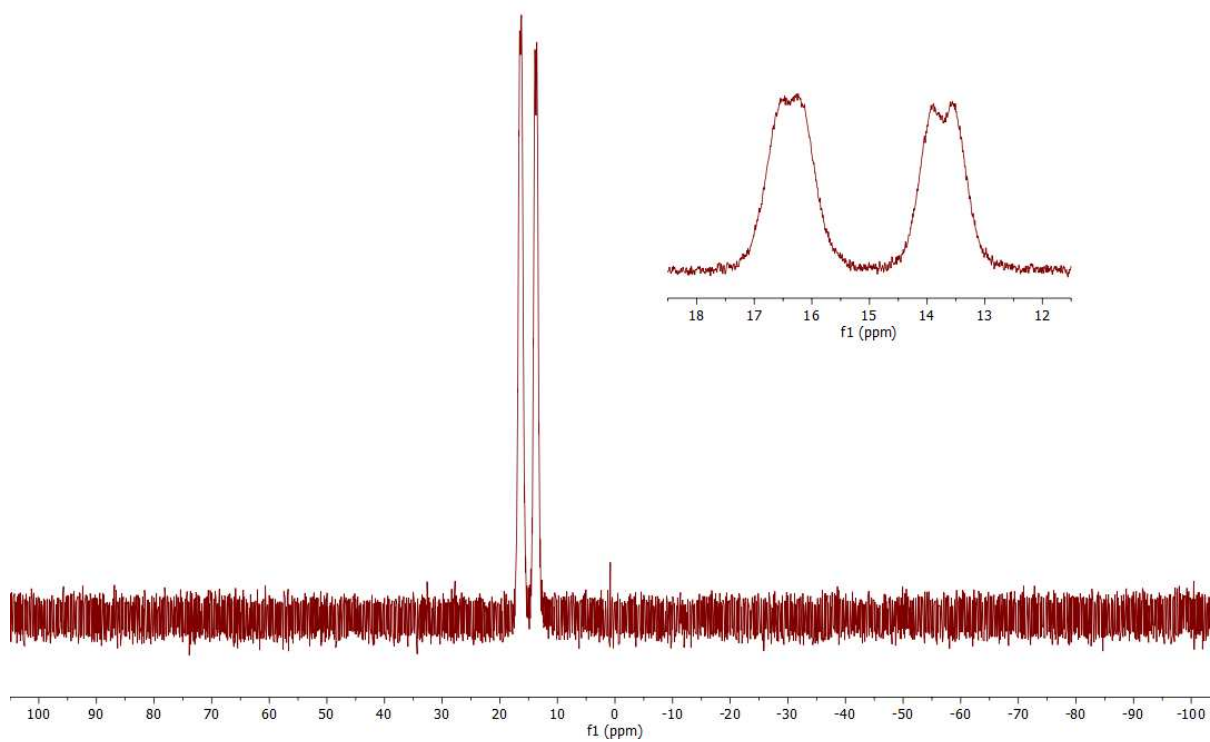

**Figure S28**  $^{31}\text{P}\{^1\text{H}\}$  NMR spectrum (162 MHz,  $\text{CDCl}_3$ ) of **4**

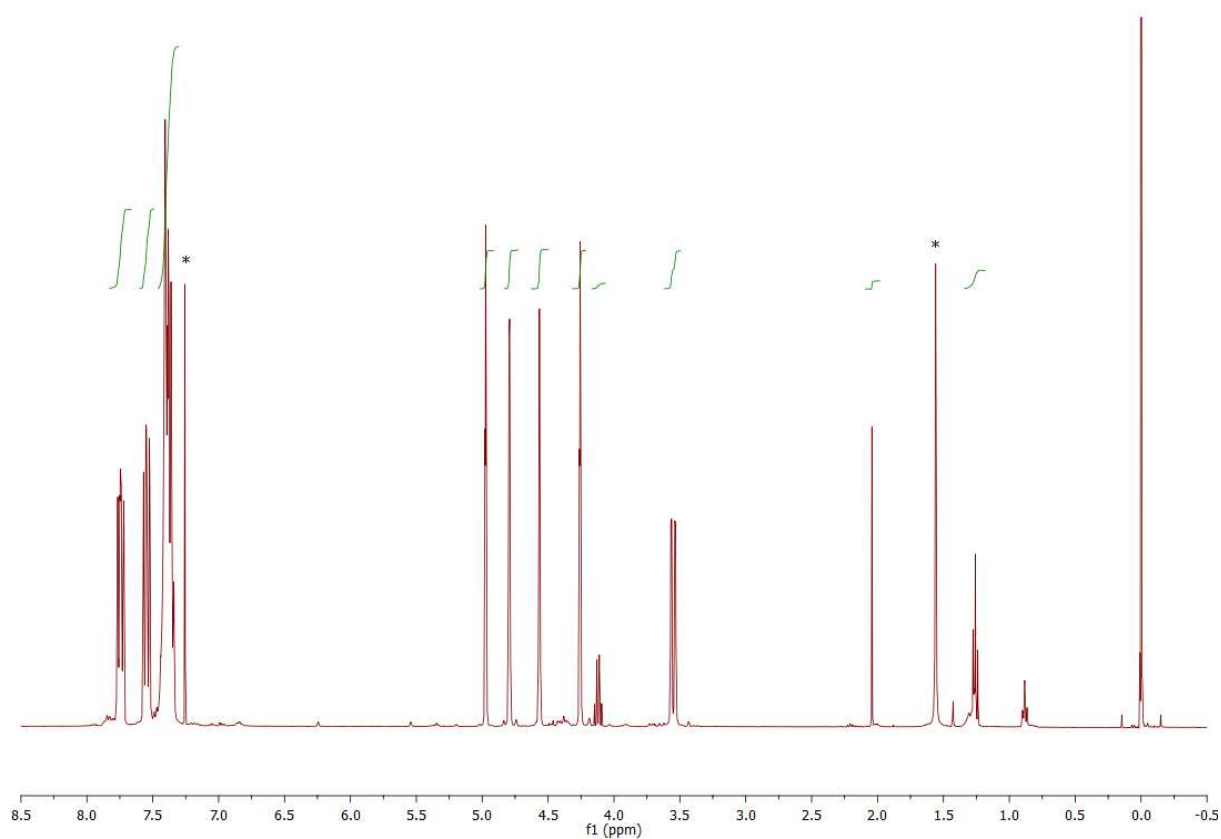

**Figure S29**  $^1\text{H}$  NMR spectrum (400 MHz,  $\text{CDCl}_3$ ) of **5** (*trans*-isomer)

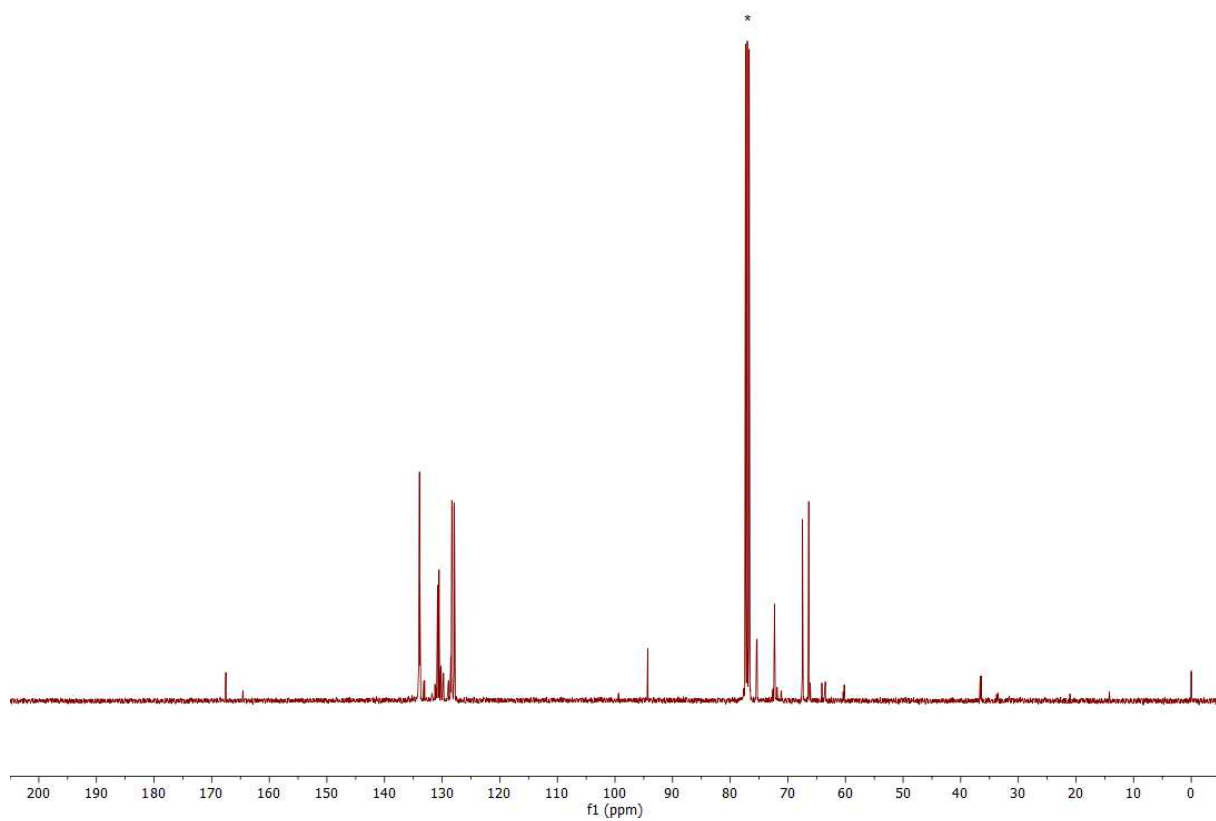

**Figure S30**  $^{13}\text{C}\{^1\text{H}\}$  NMR spectrum (101 MHz,  $\text{CDCl}_3$ ) of **5** (the dominating *trans* isomer partly isomerises to the *cis/trans* mixture during the data collection)

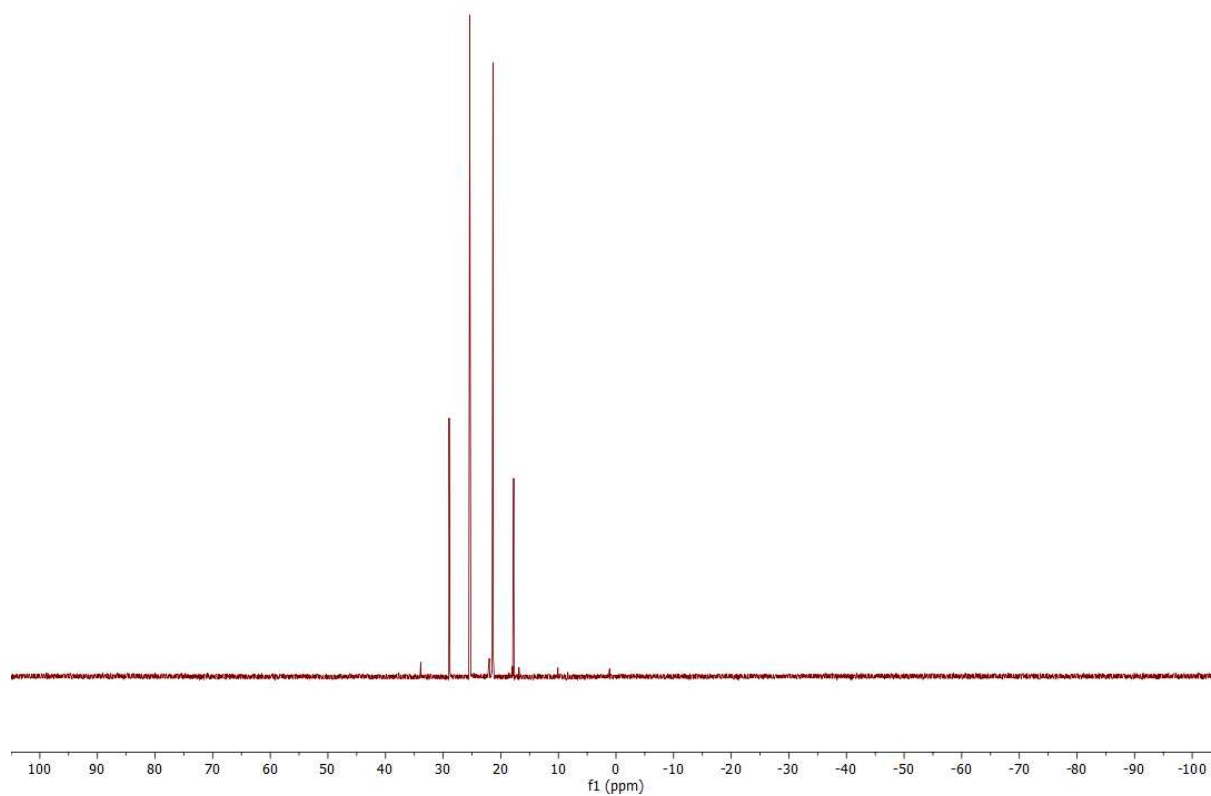

**Figure S31**  $^{31}\text{P}\{^1\text{H}\}$  NMR spectrum (162 MHz,  $\text{CDCl}_3$ ) of **5** (*trans*-isomer)

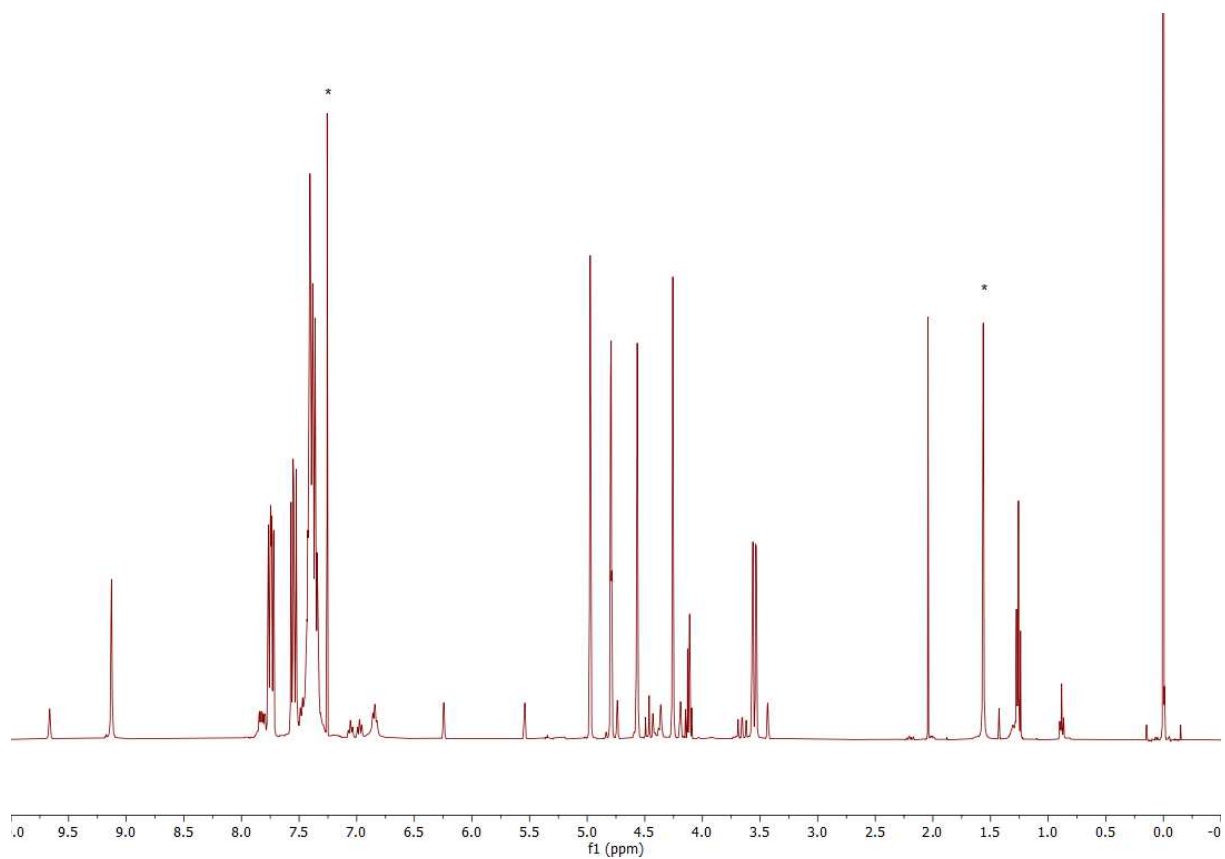

**Figure S32**  $^1\text{H}$  NMR spectrum (400 MHz,  $\text{CDCl}_3$ ) of **5** (equilibrium mixture)

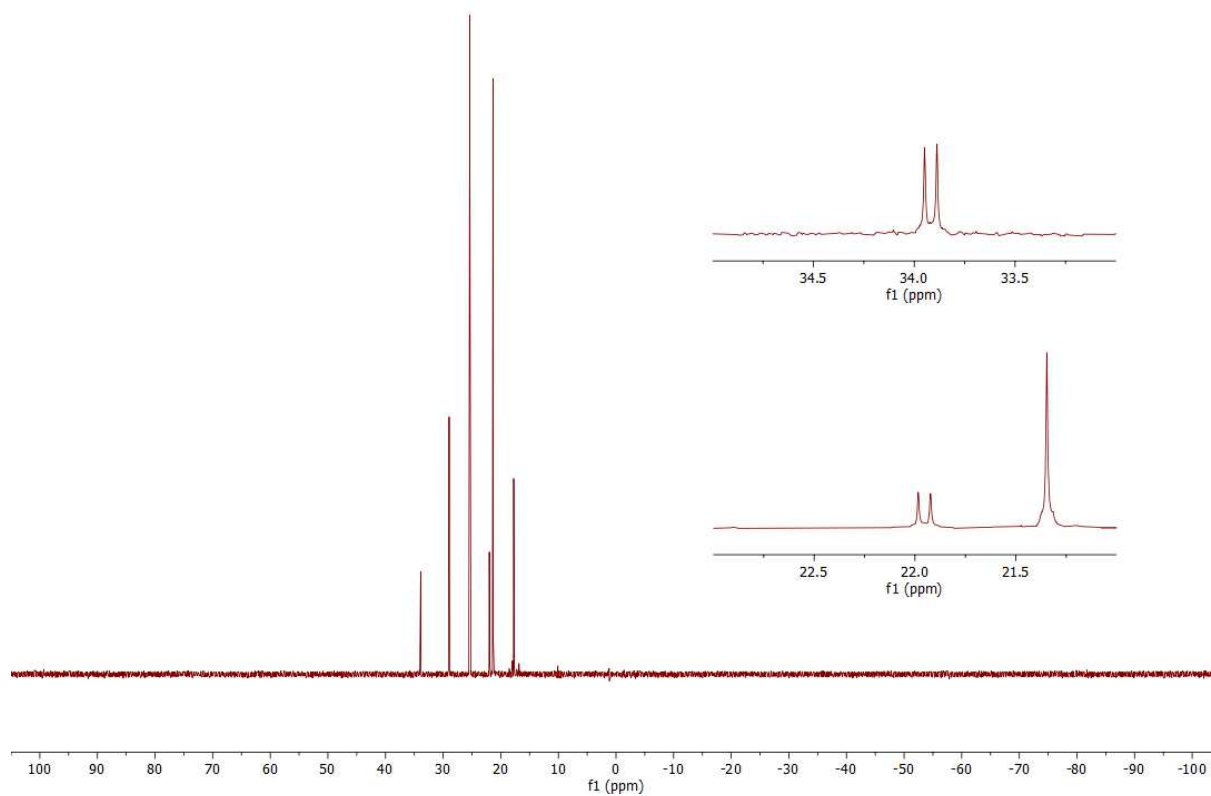

**Figure S33**  $^{31}\text{P}\{^1\text{H}\}$  NMR spectrum (162 MHz,  $\text{CDCl}_3$ ) of **5** (equilibrium mixture)

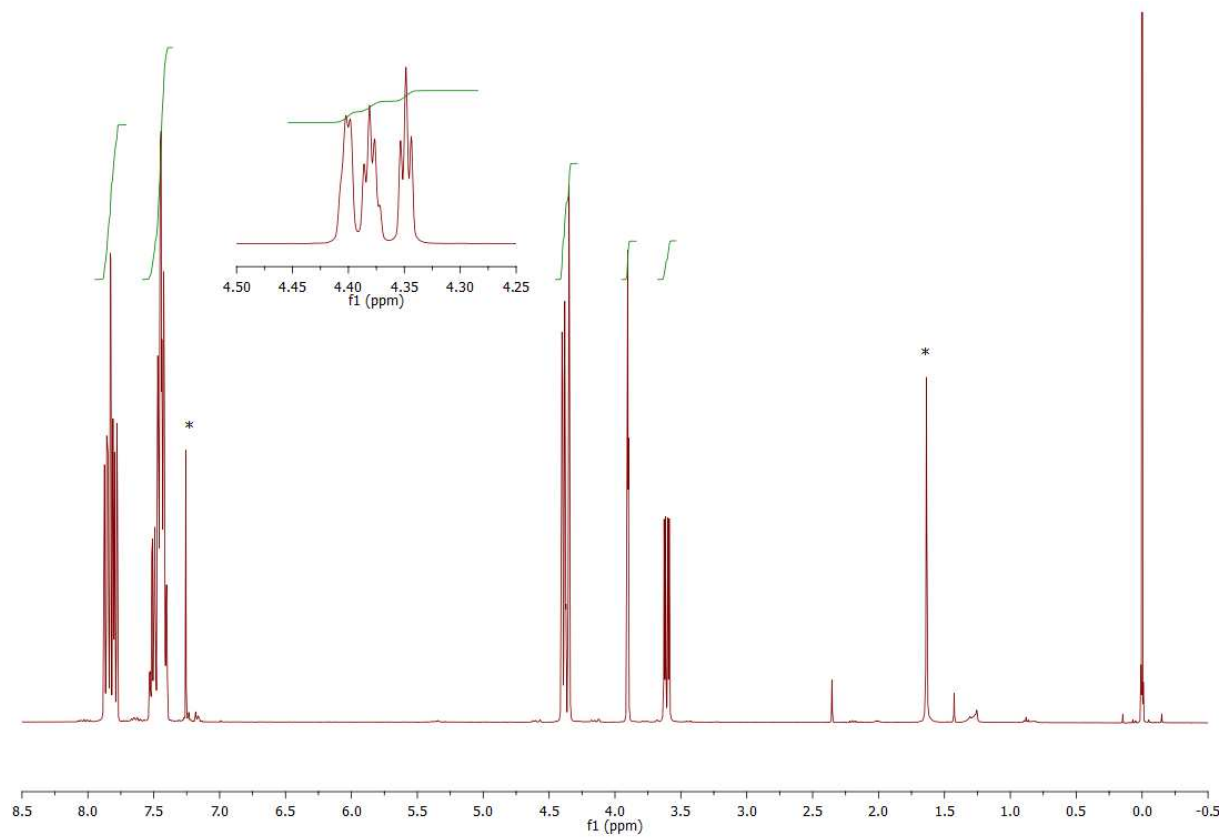

**Figure S34**  $^1\text{H}$  NMR spectrum (400 MHz,  $\text{CDCl}_3$ ) of **6**

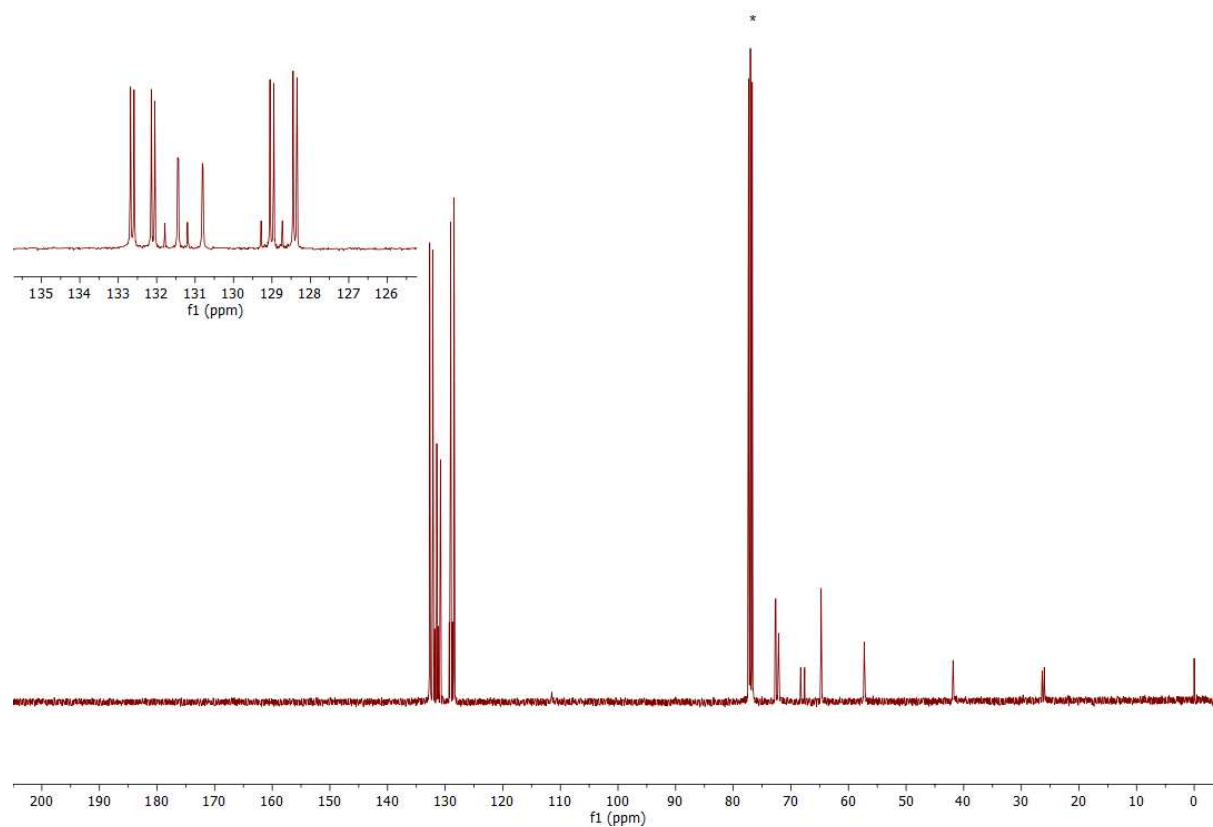

**Figure S35**  $^{13}\text{C}\{^1\text{H}\}$  NMR spectrum (101 MHz,  $\text{CDCl}_3$ ) of **6**

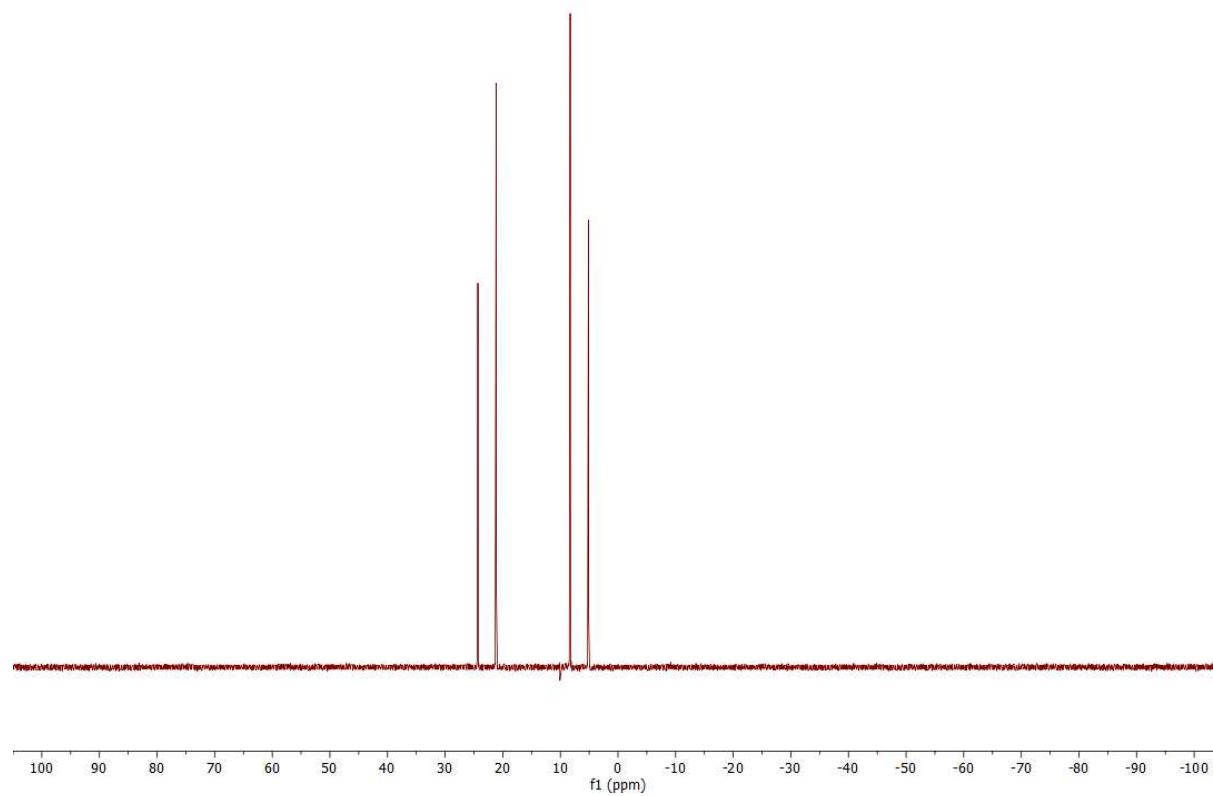

**Figure S36**  $^{31}\text{P}\{^1\text{H}\}$  NMR spectrum (162 MHz,  $\text{CDCl}_3$ ) of **6**

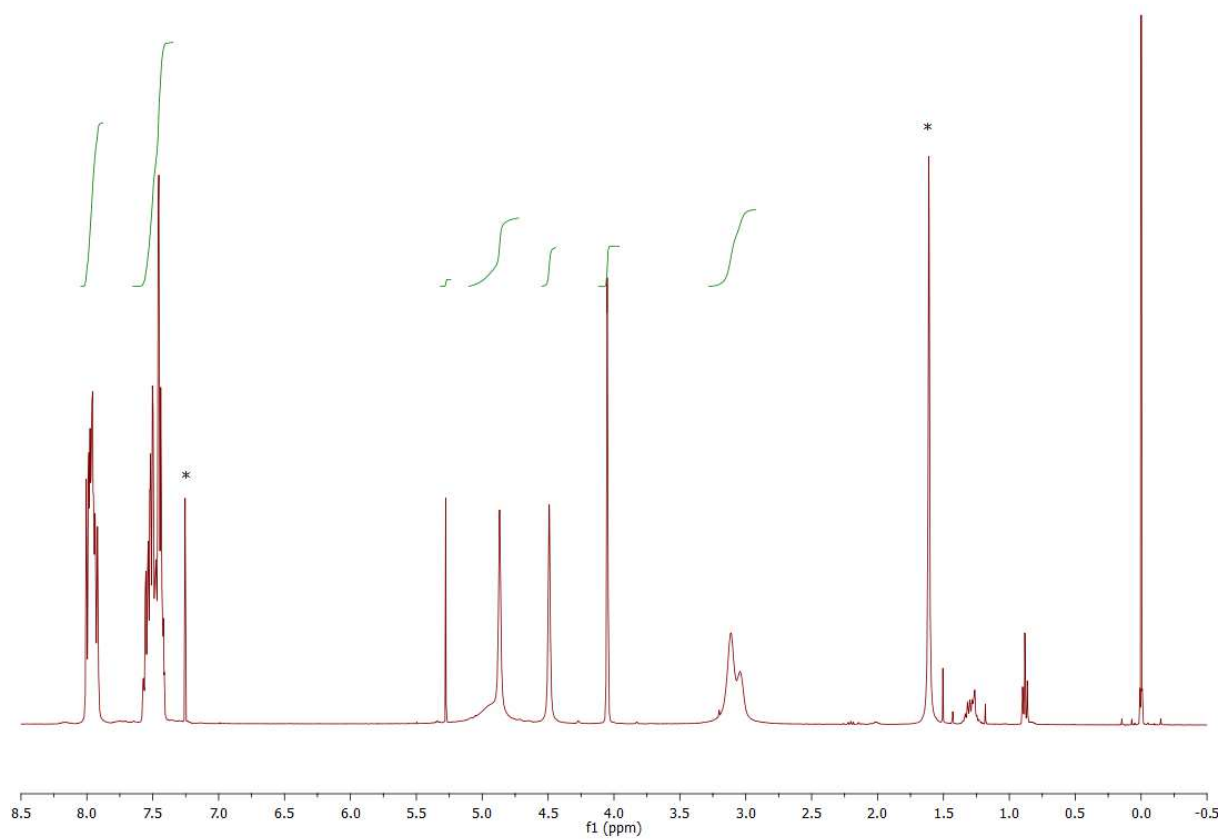

**Figure S37**  $^1\text{H}$  NMR spectrum (400 MHz,  $\text{CDCl}_3$ ,  $50^\circ\text{C}$ ) of **7**

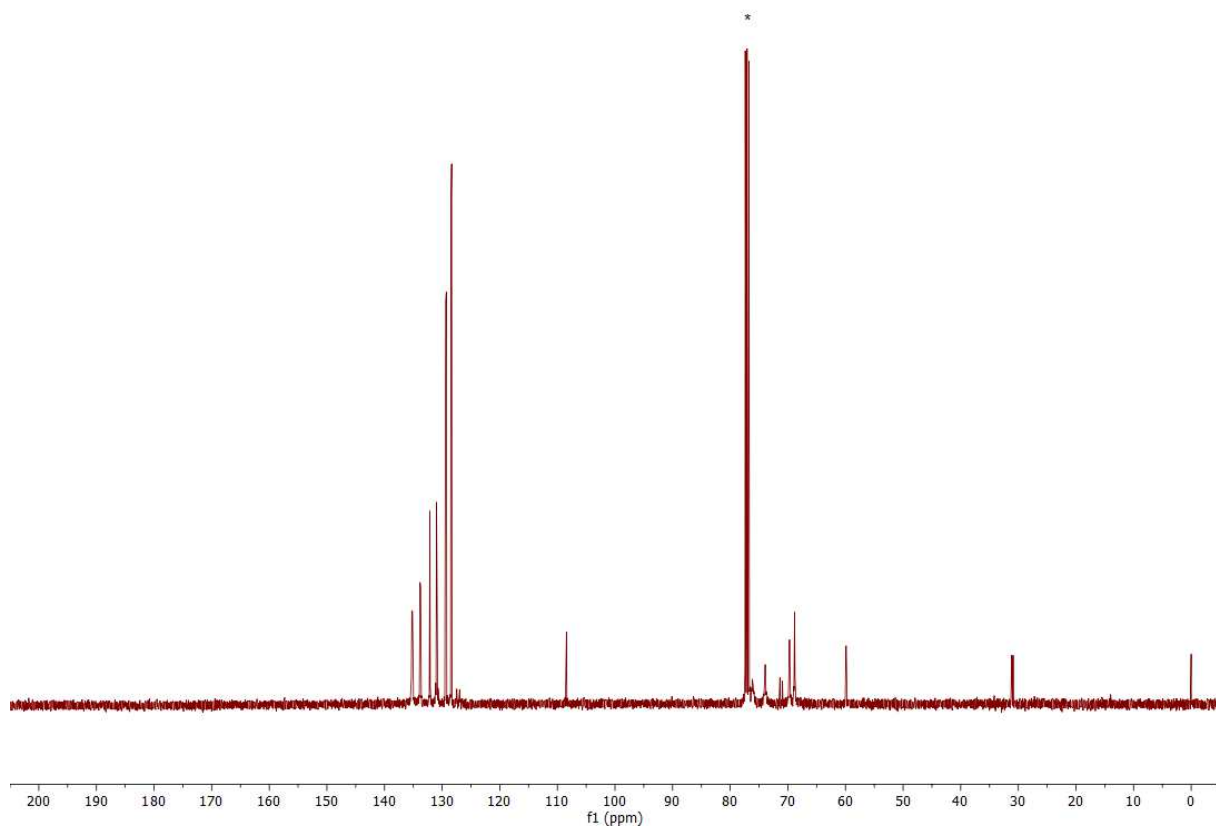

**Figure S38**  $^{13}\text{C}\{^1\text{H}\}$  NMR spectrum (101 MHz,  $\text{CDCl}_3$ ,  $50^\circ\text{C}$ ) of **7**

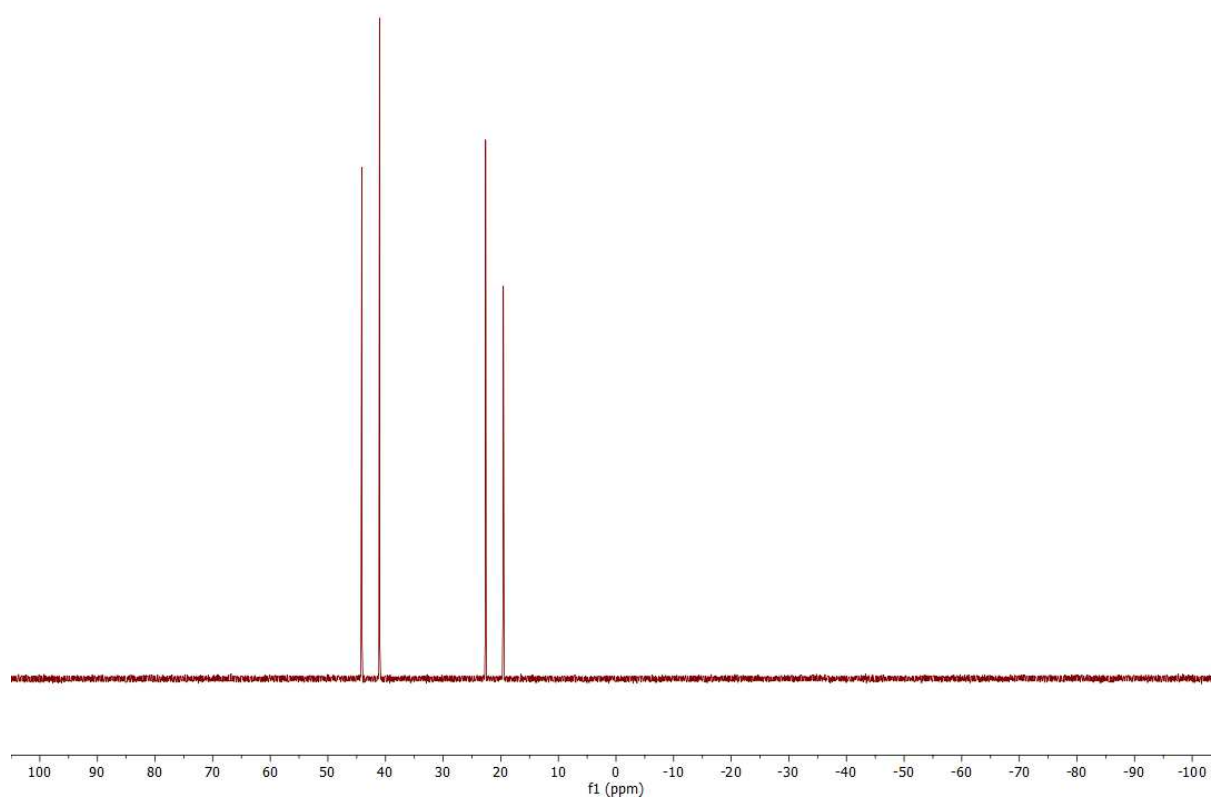

**Figure S39**  $^{31}\text{P}\{^1\text{H}\}$  NMR spectrum (162 MHz,  $\text{CDCl}_3$ ) of **7**

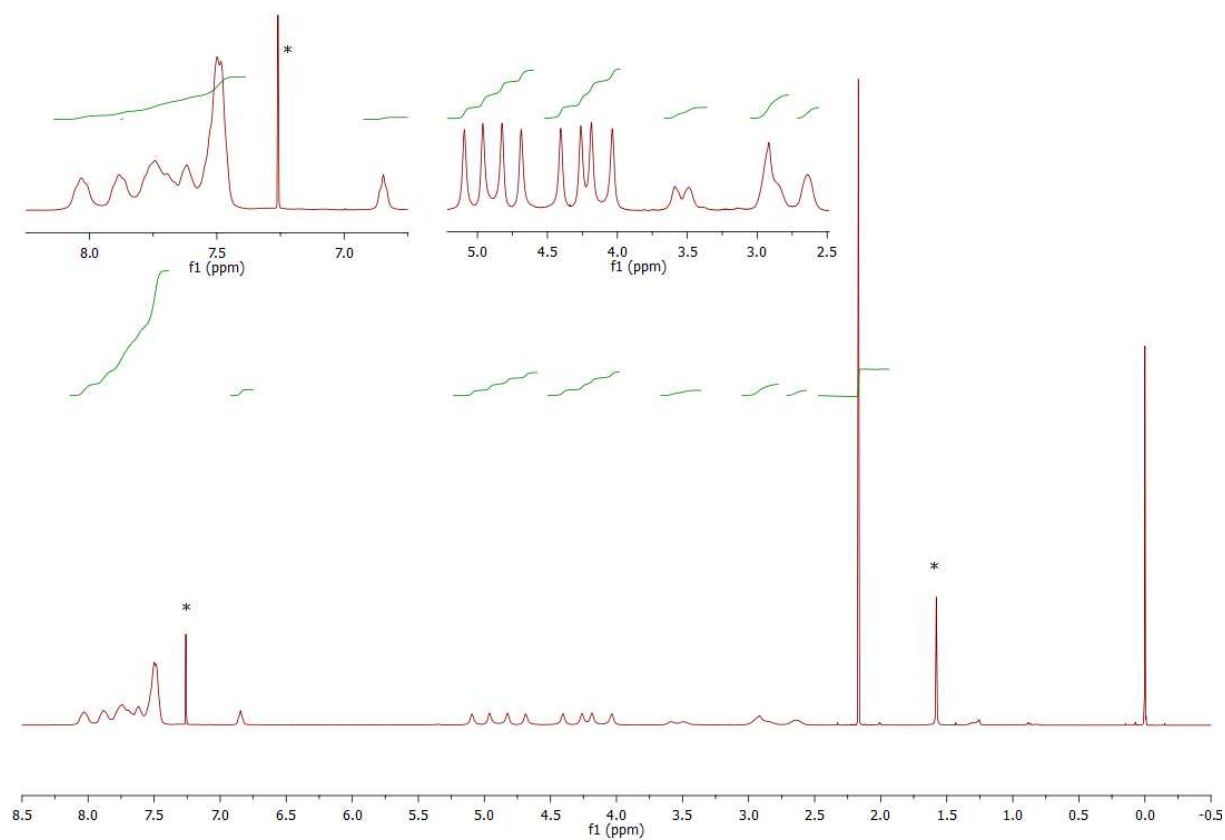

**Figure S40**  $^1\text{H}$  NMR spectrum (400 MHz,  $\text{CDCl}_3$ ) of **8**



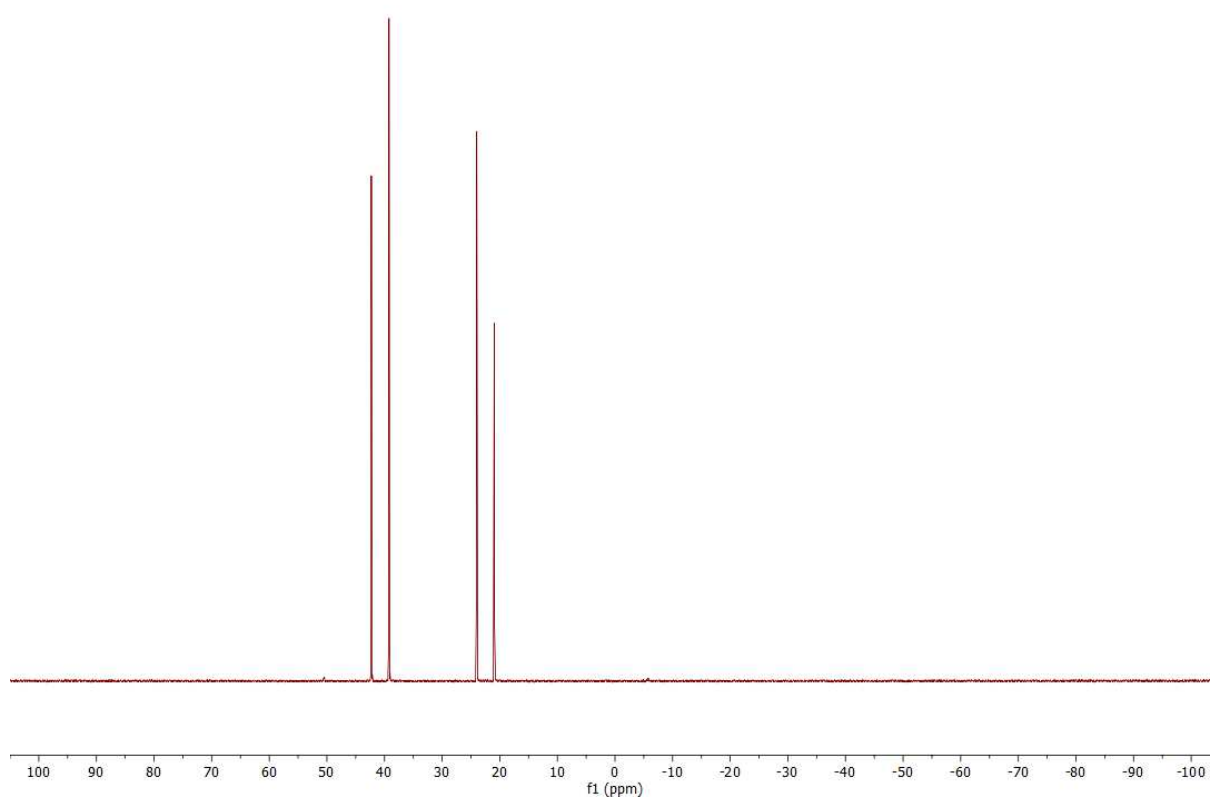

**Figure S41.**  $^{31}\text{P}\{^1\text{H}\}$  NMR spectrum (162 MHz,  $\text{CDCl}_3$ ) of **8**.

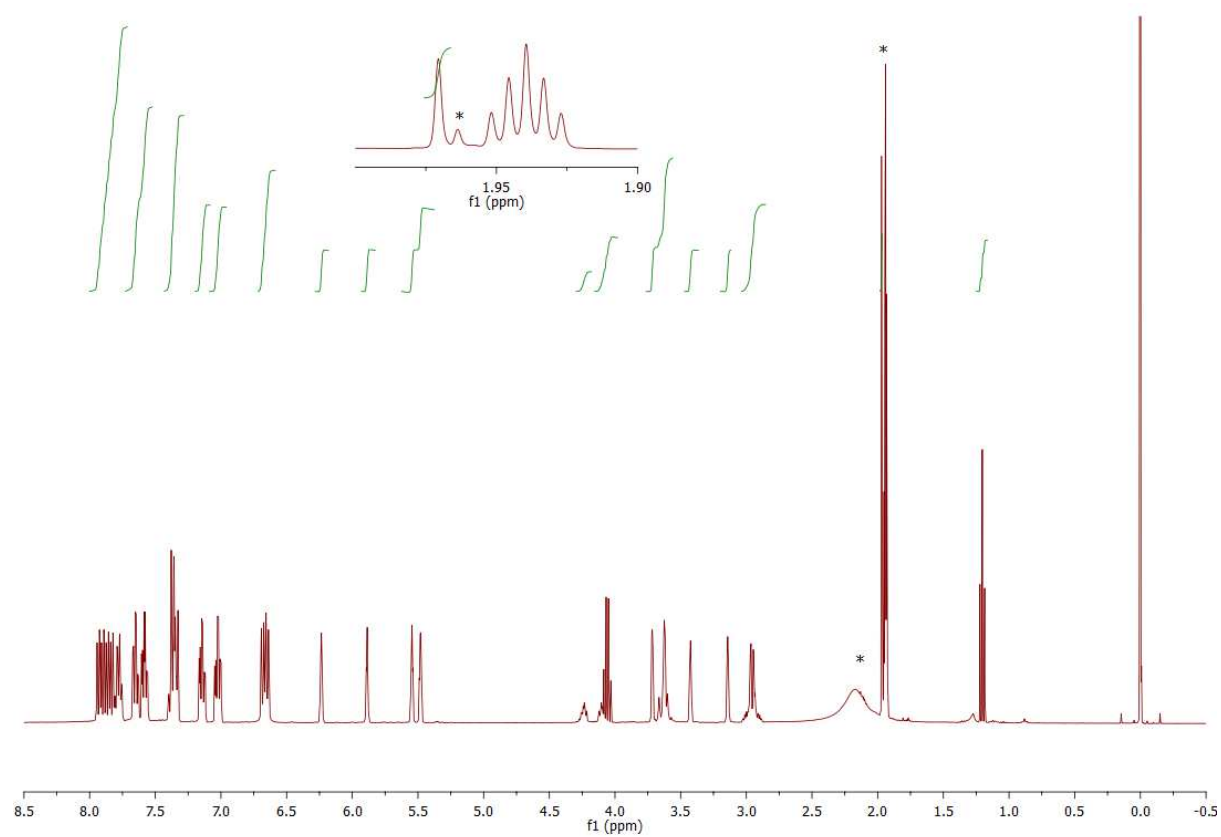

**Figure S42**  $^1\text{H}$  NMR spectrum (400 MHz,  $\text{CD}_3\text{CN}$ ) of **9**

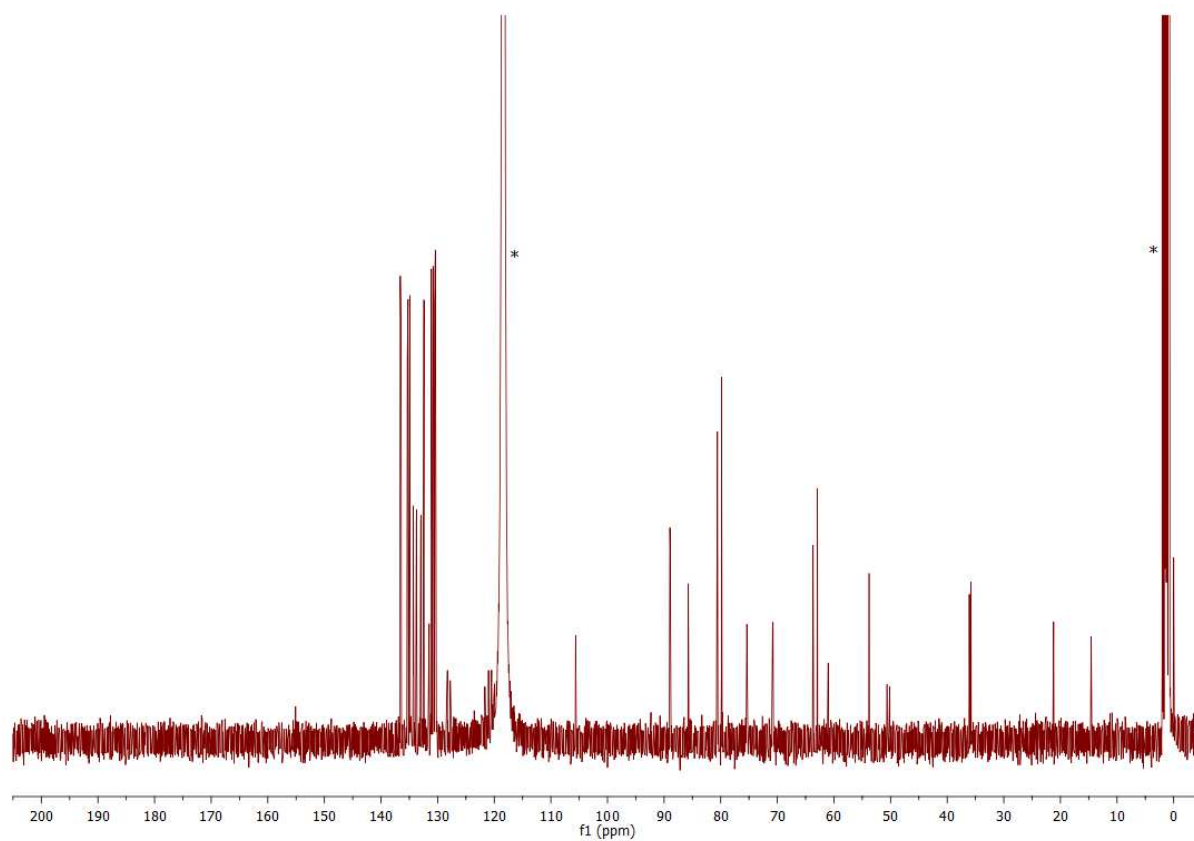

**Figure S43**  $^{13}\text{C}\{^1\text{H}\}$  NMR spectrum (101 MHz,  $\text{CD}_3\text{CN}$ ) of **9**

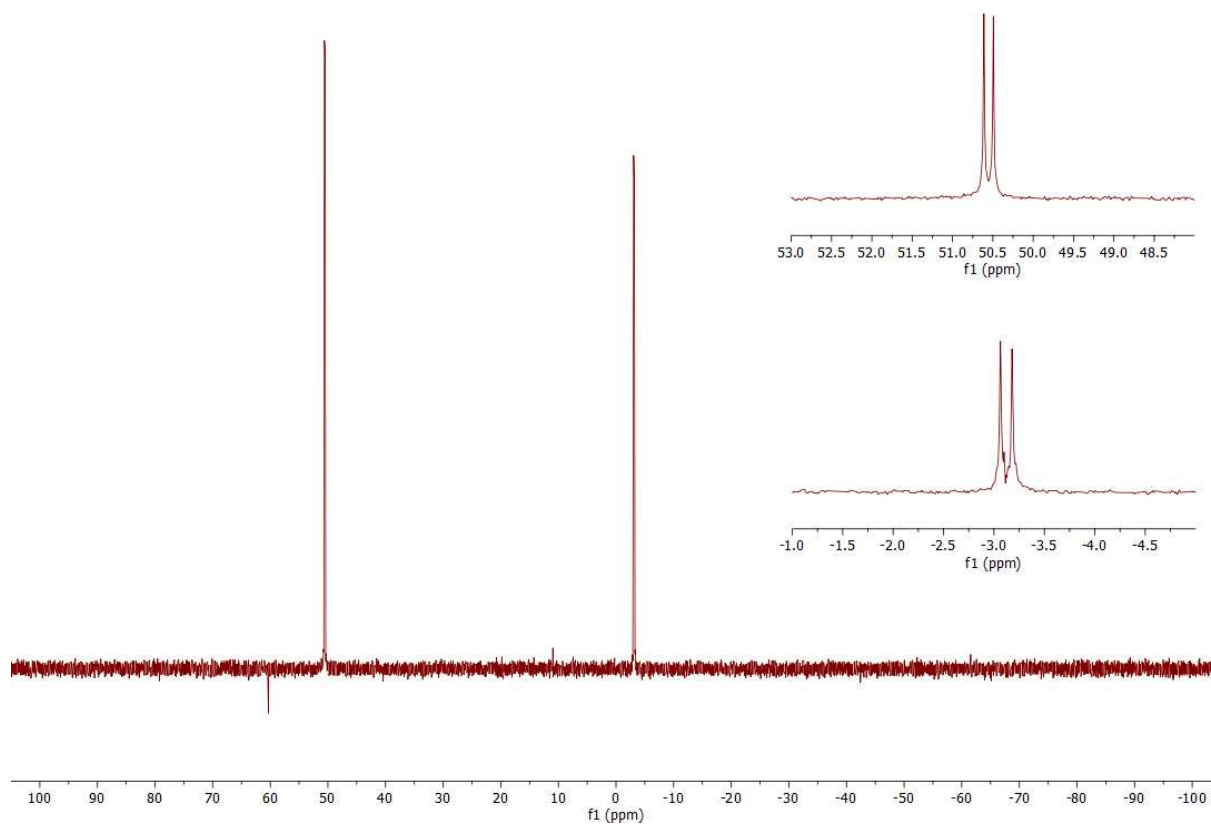

**Figure S44**  $^{31}\text{P}\{^1\text{H}\}$  NMR spectrum (162 MHz,  $\text{CD}_3\text{CN}$ ) of **9**
